# Supplementary material
Source: PubMed Central journal article supplement (PMC11684312)
Supplement: NIHMS2033297-supplement-Supp_References.pdf [file NIHMS2033297-supplement-Supp_References.pdf]

## Supplementary References

1. Varadi, M.; Anyango, S.; Deshpande, M.; Nair, S.; Natassia, C.; Yordanova, G.; Yuan, D.; Stroe, O.; Wood, G.; Laydon, A.; Židek, A.; Green, T.; Tunyasuvunakool, K.; Petersen, S.; Jumper, J.; Clancy, E.; Green, R.; Vora, A.; Lutfi, M.; Figurnov, M.; Cowie, A.; Hobbs, N.; Kohli, P.; Kleywegt, G.; Birney, E.; Hassabis, D.; Velankar, S., AlphaFold Protein Structure Database: massively expanding the structural coverage of protein-sequence space with high-accuracy models. *Nucleic Acids Res* **2022**, *50* (D1), D439-d444.
2. Jumper, J.; Evans, R.; Pritzel, A.; Green, T.; Figurnov, M.; Ronneberger, O.; Tunyasuvunakool, K.; Bates, R.; Židek, A.; Potapenko, A.; Bridgland, A.; Meyer, C.; Kohl, S. A. A.; Ballard, A. J.; Cowie, A.; Romera-Paredes, B.; Nikolov, S.; Jain, R.; Adler, J.; Back, T.; Petersen, S.; Reiman, D.; Clancy, E.; Zielinski, M.; Steinegger, M.; Pacholska, M.; Berghammer, T.; Bodenstein, S.; Silver, D.; Vinyals, O.; Senior, A. W.; Kavukcuoglu, K.; Kohli, P.; Hassabis, D., Highly accurate protein structure prediction with AlphaFold. *Nature* **2021**, *596* (7873), 583-589.
3. Melber, A.; Na, U.; Vashisht, A.; Weiler, B. D.; Lill, R.; Wohlschlegel, J. A.; Winge, D. R., Role of Nfu1 and Bol3 in iron-sulfur cluster transfer to mitochondrial clients. *Elife* **2016**, *5*.
4. Cai, K.; Markley, J. L., NMR as a Tool to Investigate the Processes of Mitochondrial and Cytosolic Iron-Sulfur Cluster Biosynthesis. *Molecules* **2018**, *23* (9).
5. Michl, J.; Wang, Y.; Monterisi, S.; Blaszczak, W.; Beveridge, R.; Bridges, E. M.; Koth, J.; Bodmer, W. F.; Swietach, P., CRISPR-Cas9 screen identifies oxidative phosphorylation as essential for cancer cell survival at low extracellular pH. *Cell Rep* **2022**, *38* (10), 110493.
6. Lazear, M. R.; Remsberg, J. R.; Jaeger, M. G.; Rothamel, K.; Her, H. L.; DeMeester, K. E.; Njomen, E.; Hogg, S. J.; Rahman, J.; Whitby, L. R.; Won, S. J.; Schafroth, M. A.; Ogasawara, D.; Yokoyama, M.; Lindsey, G. L.; Li, H.; Germain, J.; Barbas, S.; Vaughan, J.; Hanigan, T. W.; Vartabedian, V. F.; Reinhardt, C. J.; Dix, M. M.; Koo, S. J.; Heo, I.; Teijaro, J. R.; Simon, G. M.; Ghosh, B.; Abdel-Wahab, O.; Ahn, K.; Saghatelian, A.; Melillo, B.; Schreiber, S. L.; Yeo, G. W.; Cravatt, B. F., Proteomic discovery of chemical probes that perturb protein complexes in human cells. *Mol Cell* **2023**.
7. Christensen, S.; Van der Roest, B.; Besselink, N.; Janssen, R.; Boymans, S.; Martens, J. W. M.; Yaspo, M. L.; Priestley, P.; Kuijk, E.; Cuppen, E.; Van Hoeck, A., 5-Fluorouracil treatment induces characteristic T>G mutations in human cancer. *Nat Commun* **2019**, *10* (1), 4571.
8. Pisoni, G. B.; Ruddock, L. W.; Bulleid, N.; Molinari, M., Division of labor among oxidoreductases: TMX1 preferentially acts on transmembrane polypeptides. *Mol Biol Cell* **2015**, *26* (19), 3390-400.
9. Guerra, C.; Molinari, M., Thioredoxin-Related Transmembrane Proteins: TMX1 and Little Brothers TMX2, TMX3, TMX4 and TMX5. *Cells* **2020**, *9* (9).
10. Hanke, T.; Mathea, S.; Woortman, J.; Salah, E.; Berger, B. T.; Tumber, A.; Kashima, R.; Hata, A.; Kuster, B.; Müller, S.; Knapp, S., Development and Characterization of Type I, Type II, and Type III LIM-Kinase Chemical Probes. *J Med Chem* **2022**, *65* (19), 13264-13287.
11. Salah, E.; Chatterjee, D.; Beltrami, A.; Tumber, A.; Preuss, F.; Canning, P.; Chaikuad, A.; Knaus, P.; Knapp, S.; Bullock, A. N.; Mathea, S., Lessons from LIMK1 enzymology and their impact on inhibitor design. *Biochem J* **2019**, *476* (21), 3197-3209.
12. Robers, M. B.; Wilkinson, J. M.; Vasta, J. D.; Berger, L. M.; Berger, B. T.; Knapp, S., Single tracer-based protocol for broad-spectrum kinase profiling in live cells with NanoBRET. *STAR Protoc* **2021**, *2* (4), 100822.
13. Huang, D.; Chen, P.; Huang, G.; Sun, H.; Luo, X.; He, C.; Chen, F.; Wang, Y.; Zeng, C.; Su, L.; Zeng, X.; Lu, J.; Li, S.; Huang, D.; Gao, H.; Cao, M., Salt-inducible kinases

inhibitor HG-9-91-01 targets RIPK3 kinase activity to alleviate necroptosis-mediated inflammatory injury. *Cell Death Dis* **2022**, *13* (2), 188.

14. Liu, Q.; Sabnis, Y.; Zhao, Z.; Zhang, T.; Buhrlage, S. J.; Jones, L. H.; Gray, N. S., Developing irreversible inhibitors of the protein kinase cysteinome. *Chem Biol* **2013**, *20* (2), 146-59.
15. Chaikuad, A.; Koch, P.; Laufer, S. A.; Knapp, S., The Cysteinome of Protein Kinases as a Target in Drug Development. *Angew Chem Int Ed Engl* **2018**, *57* (16), 4372-4385.
16. Davies, C. W.; Paul, L. N.; Kim, M. I.; Das, C., Structural and thermodynamic comparison of the catalytic domain of AMSH and AMSH-LP: nearly identical fold but different stability. *J Mol Biol* **2011**, *413* (2), 416-29.
17. Sato, Y.; Yoshikawa, A.; Yamagata, A.; Mimura, H.; Yamashita, M.; Ookata, K.; Nureki, O.; Iwai, K.; Komada, M.; Fukai, S., Structural basis for specific cleavage of Lys 63-linked polyubiquitin chains. *Nature* **2008**, *455* (7211), 358-62.
18. Pettinger, J.; Le Bihan, Y. V.; Widya, M.; van Montfort, R. L.; Jones, K.; Cheeseman, M. D., An Irreversible Inhibitor of HSP72 that Unexpectedly Targets Lysine-56. *Angew Chem Int Ed Engl* **2017**, *56* (13), 3536-3540.
19. Anscombe, E.; Meschini, E.; Mora-Vidal, R.; Martin, M. P.; Staunton, D.; Geitmann, M.; Danielson, U. H.; Stanley, W. A.; Wang, L. Z.; Reuillon, T.; Golding, B. T.; Cano, C.; Newell, D. R.; Noble, M. E.; Wedge, S. R.; Endicott, J. A.; Griffin, R. J., Identification and Characterization of an Irreversible Inhibitor of CDK2. *Chem Biol* **2015**, *22* (9), 1159-64.
20. Wymann, M. P.; Bulgarelli-Leva, G.; Zvelebil, M. J.; Pirola, L.; Vanhaesebroeck, B.; Waterfield, M. D.; Panayotou, G., Wortmannin inactivates phosphoinositide 3-kinase by covalent modification of Lys-802, a residue involved in the phosphate transfer reaction. *Mol Cell Biol* **1996**, *16* (4), 1722-33.
21. Rogne, P.; Dulko-Smith, B.; Goodman, J.; Rosselin, M.; Grundström, C.; Hedberg, C.; Nam, K.; Sauer-Eriksson, A. E.; Wolf-Watz, M., Structural Basis for GTP versus ATP Selectivity in the NMP Kinase AK3. *Biochemistry* **2020**, *59* (38), 3570-3581.
22. Feldman, H. C.; Merlini, E.; Guijas, C.; DeMeester, K. E.; Njomen, E.; Kozina, E. M.; Yokoyama, M.; Vinogradova, E.; Reardon, H. T.; Melillo, B.; Schreiber, S. L.; Loreto, A.; Blankman, J. L.; Cravatt, B. F., Selective inhibitors of SARM1 targeting an allosteric cysteine in the autoregulatory ARM domain. *Proc Natl Acad Sci U S A* **2022**, *119* (35), e2208457119.
23. Fulmer, G. R.; Miller, A. J. M.; Sherden, N. H.; Gottlieb, H. E.; Nudelman, A.; Stoltz, B. M.; Bercaw, J. E.; Goldberg, K. I., NMR Chemical Shifts of Trace Impurities: Common Laboratory Solvents, Organics, and Gases in Deuterated Solvents Relevant to the Organometallic Chemist. *Organometallics* **2010**, *29* (9), 2176-2179.
