# Supplementary material
Source: PubMed Central journal article supplement (PMC11684312)
Supplement: NIHMS2033297-supplement-Supp_Synthetic_Chemistry.pdf [file NIHMS2033297-supplement-Supp_Synthetic_Chemistry.pdf]

## Supplementary Synthetic Chemistry Information

### Synthesis of stereoisomeric probes

The stereoisomeric probes used in this study were prepared by adapting previously reported procedures (**Supplementary Data Fig. 1**)<sup>6,22</sup> Analytical characterization data is provided for all new compounds.

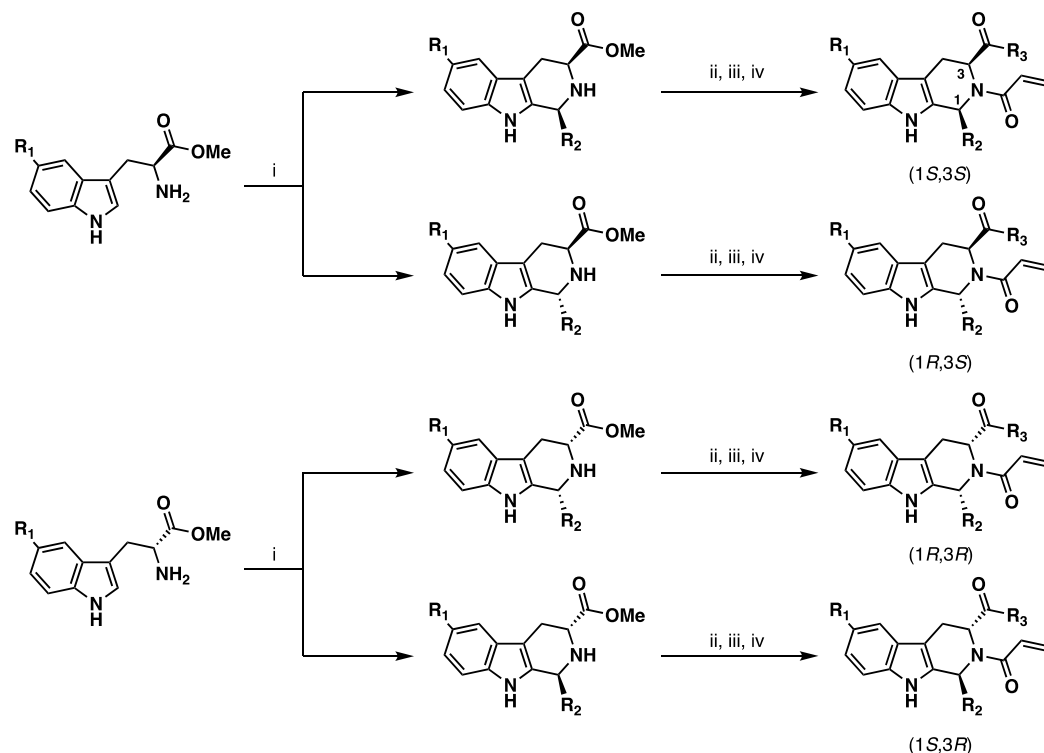

**Supplementary Data Fig. 1. General scheme for the synthesis of tryptoline acrylamide stereoisomeric probes.** Steps: (i) Pictet-Spengler cyclization followed by chromatographic separation of diastereomers; (ii) ester hydrolysis; (iii) amide coupling; (iv) acrylamide installation.

### General considerations

All NMR spectra were recorded at 298 K unless otherwise noted.  $^1\text{H}$  NMR spectra were recorded on Bruker Avance III 400, Avance III HD 400, Avance Neo 400 spectrometers ( $^1\text{H}$ , 400 MHz).  $^{13}\text{C}$  NMR spectra were recorded on a Bruker Avance III HD 600 spectrometer ( $^{13}\text{C}$ , 151 MHz).  $^{19}\text{F}$  NMR spectra were recorded on a Bruker AV Neo 399 MHz spectrometer ( $^{19}\text{F}$ , 376 MHz).  $^1\text{H}$  NMR data are reported as follows: chemical shift ( $\delta$ ), multiplicity (s = singlet, d = doublet, t = triplet, m = multiplet; br = broad), coupling constants, and integration. Chemical shifts are reported in parts per million (ppm) using the appropriate solvent as reference<sup>23</sup>. Analytical supercritical fluid chromatography (SFC) was performed on a Shimadzu LC system (flow rate: 3 mL/min, back pressure: 100 Bar, column temperature: 35 °C) equipped with a polydiode array detector. HRMS was performed on a 6230 TOF LC/MS with a Dual AJS EI source by injecting 5  $\mu\text{M}$  compounds in MeOH with 20% solvent A (0.1% formic acid in water) and 80% solvent B (0.1% formic acid in acetonitrile).

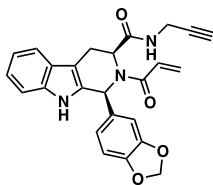

**(1S,3S)-2-acryloyl-1-(benzo[d][1,3]dioxol-5-yl)-N-(prop-2-yn-1-yl)-2,3,4,9-tetrahydro-1H-pyrido[3,4-b]indole-3-carboxamide (WX-01-05)**

WX-01-05 (aka MY-13A) was prepared as reported previously<sup>22</sup>.

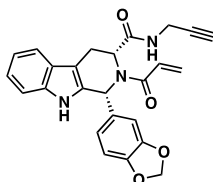

**(1R,3R)-2-acryloyl-1-(benzo[d][1,3]dioxol-5-yl)-N-(prop-2-yn-1-yl)-2,3,4,9-tetrahydro-1H-pyrido[3,4-b]indole-3-carboxamide (WX-01-07)**

WX-01-07 (aka MY-13B) was prepared as reported previously<sup>22</sup>.

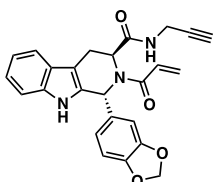

**(1R,3S)-2-acryloyl-1-(benzo[d][1,3]dioxol-5-yl)-N-(prop-2-yn-1-yl)-2,3,4,9-tetrahydro-1H-pyrido[3,4-b]indole-3-carboxamide (WX-01-06)**

<sup>1</sup>H NMR (400 MHz, CDCl<sub>3</sub>) δ 8.32 (s, 1H), 7.51 (d, *J* = 7.6 Hz, 1H), 7.23 (d, *J* = 7.8 Hz, 1H), 7.11 (dtd, *J* = 16.1, 7.1, 1.3 Hz, 2H), 6.84 – 6.77 (m, 2H), 6.77 – 6.70 (m, 1H), 6.60 (dd, *J* = 16.6, 10.4 Hz, 1H), 6.47 – 6.24 (m, 2H), 6.02 (br. s, 1H), 5.95 – 5.89 (m, 2H), 5.70 (d, *J* = 10.3 Hz, 1H), 4.93 (t, *J* = 6.0 Hz, 1H),

3.97 – 3.87 (m, 1H), 3.83 (ddd, *J* = 17.6, 5.2, 2.6 Hz, 1H), 3.48 (dd, *J* = 15.9, 5.6 Hz, 1H), 3.35 – 3.22 (m, 1H), 2.06 (t, *J* = 2.5 Hz, 1H).

<sup>13</sup>C NMR (151 MHz, CDCl<sub>3</sub>) δ 170.74, 169.96, 168.95, 164.81, 148.48, 147.59, 136.65, 135.22, 132.60, 131.49, 131.46, 130.11, 128.29, 126.56, 126.52, 123.32, 122.73, 122.57, 120.42, 120.05, 120.00, 118.69, 118.63, 111.32, 111.22, 108.79, 108.72, 108.68, 107.31, 107.14, 101.74, 101.48, 79.32, 72.05, 71.82, 57.46, 56.56, 51.09, 29.60, 23.21, 22.30.

HRMS ESI-TOF *m/z* calculated for C<sub>25</sub>H<sub>22</sub>N<sub>3</sub>O<sub>4</sub> [M+H]<sup>+</sup> 428.1605. Found 428.1596.

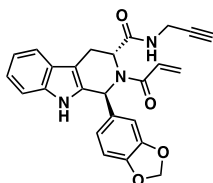

**(1S,3R)-2-acryloyl-1-(benzo[d][1,3]dioxol-5-yl)-N-(prop-2-yn-1-yl)-2,3,4,9-tetrahydro-1H-pyrido[3,4-b]indole-3-carboxamide (WX-01-08)**

<sup>1</sup>H NMR (400 MHz, CDCl<sub>3</sub>) δ 8.11 (s, 1H), 7.52 (d, *J* = 7.6 Hz, 1H), 7.25 (d, *J* = 8.8 Hz, 1H), 7.19 – 7.06 (m, 2H), 6.83 – 6.77 (m, 2H), 6.74 (d, *J* = 8.1 Hz, 1H), 6.67 – 6.52 (m, 1H), 6.44 – 6.29 (m, 2H), 6.00 – 5.80 (m, 3H), 5.71 (d, *J* = 10.3 Hz, 1H), 4.90 (t, *J* = 5.0 Hz, 1H), 4.03 – 3.90 (m, 1H), 3.90 – 3.81 (m, 1H), 3.49

(dd, *J* = 15.8, 5.9 Hz, 1H), 3.39 – 3.21 (m, 1H), 2.09 (s, 1H).

HRMS ESI-TOF *m/z* calculated for C<sub>25</sub>H<sub>22</sub>N<sub>3</sub>O<sub>4</sub> [M+H]<sup>+</sup> 428.1605. Found 428.1621.

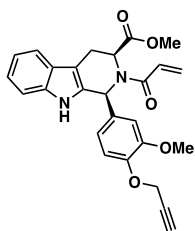

**methyl (1S,3S)-2-acryloyl-1-(3-methoxy-4-(prop-2-yn-1-yloxy)phenyl)-2,3,4,9-tetrahydro-1H-pyrido[3,4-b]indole-3-carboxylate (WX-01-01)**

<sup>1</sup>H NMR (400 MHz, CDCl<sub>3</sub>) δ 7.85 (d, *J* = 7.7 Hz, 1H), 7.60 (d, *J* = 7.6 Hz, 1H), 7.30 (dt, *J* = 8.1, 1.0 Hz, 1H), 7.21 (ddd, *J* = 8.0, 7.0, 1.5 Hz, 1H), 7.16 (td, *J* = 7.4, 1.3 Hz, 1H), 7.12 – 6.53 (m, 5H), 6.41 – 6.21 (m, 1H), 5.77 (dd, *J* = 10.8, 1.7 Hz, 1H), 5.05 (br. s, 1H), 4.71 (d, *J* = 2.4 Hz, 2H), 3.77 (s, 3H), 3.67 (br. d, *J* = 15.9 Hz, 1H), 3.25 – 2.99 (m, 4H), 2.46 (t, *J* = 2.3 Hz, 1H).

<sup>13</sup>C NMR (151 MHz, CDCl<sub>3</sub>) δ 170.87, 168.02, 149.56, 146.42, 136.55, 133.66, 130.17, 129.27, 128.12, 126.60, 122.59, 121.52, 119.88, 118.74, 113.69, 113.25, 111.16, 107.75, 78.55, 75.95, 56.74, 56.23, 56.19, 56.08, 53.54, 52.30, 51.44, 22.03.

HRMS ESI-TOF *m/z* calculated for C<sub>26</sub>H<sub>25</sub>N<sub>2</sub>O<sub>5</sub> [M+H]<sup>+</sup> 445.1758. Found 445.1757.

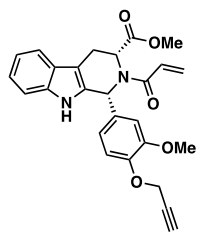

**methyl (1R,3R)-2-acryloyl-1-(3-methoxy-4-(prop-2-yn-1-yloxy)phenyl)-2,3,4,9-tetrahydro-1H-pyrido[3,4-b]indole-3-carboxylate (WX-01-03)**

$^1\text{H NMR}$  (400 MHz,  $\text{CDCl}_3$ )  $\delta$  7.95 (br. s, 1H), 7.60 (d,  $J = 7.8$  Hz, 1H), 7.30 (d,  $J = 7.9$  Hz, 1H), 7.20 (td,  $J = 7.5, 1.4$  Hz, 1H), 7.16 (td,  $J = 7.4, 1.3$  Hz, 1H), 7.11 – 6.54 (m, 5H), 6.29 (br. d,  $J = 16.3$  Hz, 1H), 5.77 (dd,  $J = 10.8, 1.7$  Hz, 1H), 5.04 (br. s, 1H), 4.70 (d,  $J = 2.4$  Hz, 2H), 3.75 (s, 3H), 3.67 (br. d,  $J = 15.6$  Hz, 1H), 3.21 – 3.01 (m, 4H), 2.45 (t,  $J = 2.4$  Hz, 1H).

HRMS ESI-TOF  $m/z$  calculated for  $\text{C}_{26}\text{H}_{25}\text{N}_2\text{O}_5$   $[\text{M}+\text{H}]^+$  445.1758. Found 445.1744.

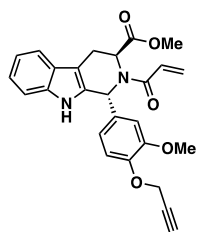

**methyl (1R,3S)-2-acryloyl-1-(3-methoxy-4-(prop-2-yn-1-yloxy)phenyl)-2,3,4,9-tetrahydro-1H-pyrido[3,4-b]indole-3-carboxylate (WX-01-02)**

$^1\text{H NMR}$  (400 MHz,  $\text{CDCl}_3$ )  $\delta$  7.83 (br. s, 1H), 7.53 (d,  $J = 7.6$  Hz, 1H), 7.29 – 7.23 (m, 1H), 7.21 – 7.09 (m, 2H), 7.01 – 6.91 (m, 2H), 6.91 – 6.85 (m, 1H), 6.56 (dd,  $J = 16.7, 10.5$  Hz, 1H), 6.29 (dd,  $J = 16.7, 1.7$  Hz, 1H), 6.16 (s, 1H), 5.64 (d,  $J = 10.5$  Hz, 1H), 5.12 – 5.05 (m, 1H), 4.73 – 4.70 (m, 2H), 3.82 (s, 3H), 3.65 (br. s, 3H), 3.61 – 3.54 (m, 1H), 3.37 – 3.16 (m, 1H), 2.48 (t,  $J = 2.1$  Hz, 1H).

$^{13}\text{C NMR}$  (151 MHz,  $\text{CDCl}_3$ )  $\delta$  171.46, 169.05, 150.37, 146.73, 136.75, 135.25, 132.54, 129.22, 128.57, 126.54, 122.56, 120.03, 119.04, 118.61, 114.43, 111.26, 111.17, 110.25, 107.83, 78.51, 76.11, 57.56, 56.86, 56.12, 54.27, 52.71, 24.14, 22.86.

HRMS ESI-TOF  $m/z$  calculated for  $\text{C}_{26}\text{H}_{25}\text{N}_2\text{O}_5$   $[\text{M}+\text{H}]^+$  445.1758. Found 445.1771.

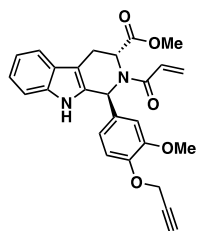

**methyl (1S,3R)-2-acryloyl-1-(3-methoxy-4-(prop-2-yn-1-yloxy)phenyl)-2,3,4,9-tetrahydro-1H-pyrido[3,4-b]indole-3-carboxylate (WX-01-04)**

$^1\text{H NMR}$  (400 MHz,  $\text{CDCl}_3$ )  $\delta$  7.89 (br. s, 1H), 7.53 (d,  $J = 7.6$  Hz, 1H), 7.25 (d,  $J = 5.5$  Hz, 1H), 7.19 – 7.07 (m, 2H), 7.01 – 6.91 (m, 2H), 6.91 – 6.84 (m, 1H), 6.56 (dd,  $J = 16.7, 10.5$  Hz, 1H), 6.29 (dd,  $J = 16.7, 1.7$  Hz, 1H), 6.16 (br. s, 1H), 5.64 (d,  $J = 10.5$  Hz, 1H), 5.12 – 5.04 (m, 1H), 4.71 (br. s, 2H), 3.81 (s, 3H), 3.65 (br. d, 3H), 3.63 – 3.51 (m, 1H), 3.42 – 3.12 (m, 1H), 2.48 (t,  $J = 2.5$  Hz, 1H).

HRMS ESI-TOF  $m/z$  calculated for  $\text{C}_{26}\text{H}_{25}\text{N}_2\text{O}_5$   $[\text{M}+\text{H}]^+$  445.1758. Found 445.1757.

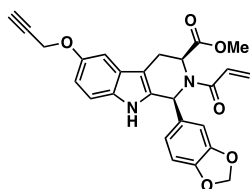

**methyl (1S,3S)-2-acryloyl-1-(benzo[d][1,3]dioxol-5-yl)-6-(prop-2-yn-1-yloxy)-2,3,4,9-tetrahydro-1H-pyrido[3,4-b]indole-3-carboxylate (WX-01-09)**

$^1\text{H NMR}$  (400 MHz,  $\text{CDCl}_3$ )  $\delta$  7.81 (br. s, 1H), 7.19 (d,  $J = 8.7$  Hz, 1H), 7.13 (d,  $J = 2.5$  Hz, 1H), 7.02 – 6.82 (m, 3H), 6.79 – 6.53 (m, 3H), 6.41 – 6.22 (m, 1H), 5.90 (s, 2H), 5.77 (dd,  $J = 10.7, 1.7$  Hz, 1H), 5.12 – 4.95 (m, 1H), 4.75

(d,  $J = 2.4$  Hz, 2H), 3.61 (br. d,  $J = 16.9$  Hz, 1H), 3.21 (br. s, 3H), 3.03 (dd,  $J = 15.6, 6.9$  Hz, 1H), 2.53 (t,  $J = 2.4$  Hz, 1H).

$^{13}\text{C NMR}$  (151 MHz,  $\text{CDCl}_3$ )  $\delta$  170.84, 167.93, 152.37, 147.79, 147.42, 133.48, 132.20, 132.06, 131.26, 129.13, 128.30, 126.91, 126.87, 122.97, 113.18, 111.86, 111.81, 110.13, 107.83, 103.14, 101.27, 79.39, 75.34, 57.15, 53.56, 52.32, 51.57, 51.03, 22.08.

HRMS ESI-TOF  $m/z$  calculated for  $\text{C}_{26}\text{H}_{23}\text{N}_2\text{O}_6$   $[\text{M}+\text{H}]^+$  459.1551. Found 459.1571.

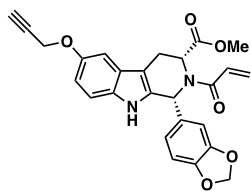

**methyl (1R,3R)-2-acryloyl-1-(benzo[d][1,3]dioxol-5-yl)-6-(prop-2-yn-1-yloxy)-2,3,4,9-tetrahydro-1H-pyrido[3,4-b]indole-3-carboxylate (WX-01-11)**

$^1\text{H}$  NMR (400 MHz,  $\text{CDCl}_3$ )  $\delta$  7.80 (br. s, 1H), 7.19 (d,  $J$  = 8.7 Hz, 1H), 7.13 (d,  $J$  = 2.4 Hz, 1H), 7.05 – 6.83 (m, 3H), 6.78 – 6.57 (m, 3H), 6.40 – 6.22 (m, 1H), 5.90 (s, 2H), 5.77 (dd,  $J$  = 10.7, 1.7 Hz, 1H), 5.04 (s, 1H), 4.75 (d,  $J$  =

2.4 Hz, 2H), 3.61 (br. d,  $J$  = 15.9 Hz, 1H), 3.21 (br. s, 3H), 3.03 (dd,  $J$  = 15.4, 6.7 Hz, 1H), 2.53 (t,  $J$  = 2.4 Hz, 1H).

HRMS ESI-TOF  $m/z$  calculated for  $\text{C}_{26}\text{H}_{23}\text{N}_2\text{O}_6$   $[\text{M}+\text{H}]^+$  459.1551. Found 459.1550.

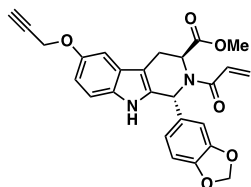

**methyl (1R,3S)-2-acryloyl-1-(benzo[d][1,3]dioxol-5-yl)-6-(prop-2-yn-1-yloxy)-2,3,4,9-tetrahydro-1H-pyrido[3,4-b]indole-3-carboxylate (WX-01-10)**

WX-01-10 was prepared as reported previously<sup>6</sup>.

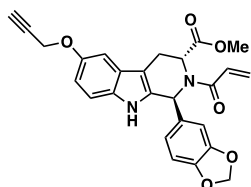

**methyl (1S,3R)-2-acryloyl-1-(benzo[d][1,3]dioxol-5-yl)-6-(prop-2-yn-1-yloxy)-2,3,4,9-tetrahydro-1H-pyrido[3,4-b]indole-3-carboxylate (WX-01-12)**

WX-01-12 was prepared as reported previously<sup>6</sup>.

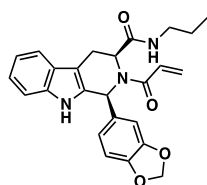

**(1S,3S)-2-acryloyl-1-(benzo[d][1,3]dioxol-5-yl)-N-propyl-2,3,4,9-tetrahydro-1H-pyrido[3,4-b]indole-3-carboxamide (WX-02-16)**

WX-02-16 was prepared as reported previously<sup>22</sup>.

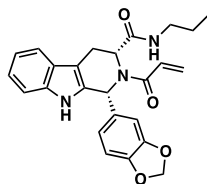

**(1R,3R)-2-acryloyl-1-(benzo[d][1,3]dioxol-5-yl)-N-propyl-2,3,4,9-tetrahydro-1H-pyrido[3,4-b]indole-3-carboxamide (WX-02-36)**

WX-02-36 was prepared as reported previously<sup>22</sup>.

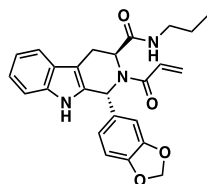

**(1R,3S)-2-acryloyl-1-(benzo[d][1,3]dioxol-5-yl)-N-propyl-2,3,4,9-tetrahydro-1H-pyrido[3,4-b]indole-3-carboxamide (WX-02-26)**

$^1\text{H}$  NMR (400 MHz,  $\text{CD}_3\text{OD}$ )  $\delta$  7.40 (d,  $J$  = 7.8 Hz, 1H), 7.25 (d,  $J$  = 8.1 Hz, 1H), 7.06 – 7.00 (m, 1H), 6.97 (td,  $J$  = 7.5, 1.1 Hz, 1H), 6.96 – 6.87 (m, 2H), 6.82 – 6.71 (m, 1H), 6.70 (dd,  $J$  = 16.7, 10.6 Hz, 1H), 6.32 (s, 1H), 6.17 (d,  $J$  = 16.8 Hz, 1H), 5.94 – 5.79 (m, 2H), 5.74 – 5.51 (m, 1H), 5.43 – 5.19 (m, 1H), 4.59 (s,

1H), 3.57 – 3.40 (m, 1H), 3.06 – 2.91 (m, 2H), 1.40 – 1.17 (m, 2H), 0.74 – 0.55 (m, 3H), 2 exchangeable protons not observed.

$^{13}\text{C}$  NMR (151 MHz,  $\text{CD}_3\text{OD}$ )  $\delta$  173.89, 170.85, 149.79, 149.05, 148.60, 147.89, 138.55, 138.21, 138.20, 136.21, 134.78, 130.52, 130.31, 128.75, 127.53, 127.52, 122.52, 120.72, 120.34, 120.11, 118.61, 112.13, 109.42, 109.01, 108.94, 107.99, 107.41, 105.46, 104.25, 102.60, 102.35, 79.47, 59.47, 58.88, 57.98, 57.48, 42.38, 42.26, 25.75, 24.61, 23.49, 11.34.

HRMS ESI-TOF  $m/z$  calculated for  $C_{25}H_{26}N_3O_4$   $[M+H]^+$  432.1918. Found 432.1909.

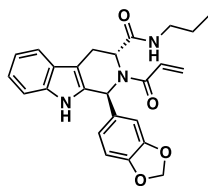

**(1S,3R)-2-acryloyl-1-(benzo[d][1,3]dioxol-5-yl)-N-propyl-2,3,4,9-tetrahydro-1H-pyrido[3,4-b]indole-3-carboxamide (WX-02-46)**

$^1H$  NMR (400 MHz,  $CD_3OD$ )  $\delta$  7.40 (d,  $J = 7.8$  Hz, 1H), 7.25 (d,  $J = 8.1$  Hz, 1H), 7.04 (t,  $J = 7.5$  Hz, 1H), 7.01 – 6.87 (m, 3H), 6.74 (s, 1H), 6.70 (dd,  $J = 16.6$ , 10.6 Hz, 1H), 6.31 (s, 1H), 6.17 (d,  $J = 16.7$  Hz, 1H), 5.95 – 5.83 (m, 2H), 5.75 – 5.57 (m, 1H), 5.43 – 5.21 (m, 1H), 4.69 – 4.50 (m, 1H), 3.57 – 3.39 (m, 1H),

3.00 (t,  $J = 5.7$  Hz, 2H), 1.29 (s, 2H), 0.74 – 0.53 (m, 3H), 2 exchangeable protons not observed.  
HRMS ESI-TOF  $m/z$  calculated for  $C_{25}H_{26}N_3O_4$   $[M+H]^+$  432.1918. Found 432.1900.

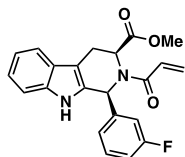

**methyl (1S,3S)-2-acryloyl-1-(3-fluorophenyl)-2,3,4,9-tetrahydro-1H-pyrido[3,4-b]indole-3-carboxylate (WX-03-57)**

$^1H$  NMR (400 MHz,  $CD_3OD$ )  $\delta$  7.54 (d,  $J = 7.8$  Hz, 1H), 7.36 – 7.23 (m, 2H), 7.17 – 6.82 (m, 7H), 6.29 (d,  $J = 16.8$  Hz, 1H), 5.84 (d,  $J = 10.9$  Hz, 1H), 5.35 (d,  $J = 5.5$  Hz, 1H), 3.62 (d,  $J = 16.0$  Hz, 1H), 3.14 – 2.92 (m, 4H), 1 exchangeable proton

not observed.

$^{13}C$  NMR (151 MHz,  $CD_3OD$ )  $\delta$  173.23, 172.12, 170.15, 169.38, 164.86, 163.24, 143.98, 143.93, 138.51, 138.36, 131.35, 130.77, 130.72, 130.22, 130.10, 129.59, 129.15, 127.55, 126.16, 124.74, 123.09, 120.16, 119.11, 117.27, 117.12, 115.86, 115.72, 112.16, 108.18, 108.13, 56.51, 54.63, 52.51, 52.42, 22.59.

$^{19}F$  NMR (376 MHz,  $CD_3OD$ )  $\delta$  -117.11, -118.06.

HRMS ESI-TOF  $m/z$  calculated for  $C_{22}H_{20}FN_2O_3$   $[M+H]^+$  379.1452. Found 379.1453.

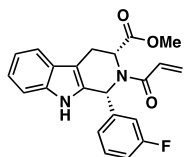

**methyl (1R,3R)-2-acryloyl-1-(3-fluorophenyl)-2,3,4,9-tetrahydro-1H-pyrido[3,4-b]indole-3-carboxylate (WX-03-59)**

$^1H$  NMR (400 MHz,  $CD_3OD$ )  $\delta$  7.54 (d,  $J = 7.8$  Hz, 1H), 7.41 – 7.22 (m, 2H), 7.19 – 6.81 (m, 7H), 6.29 (d,  $J = 16.8$  Hz, 1H), 5.83 (d,  $J = 10.9$  Hz, 1H), 5.33 (d,  $J = 6.7$  Hz, 1H), 3.61 (d,  $J = 16.0$  Hz, 1H), 3.16 – 2.95 (m, 4H), 1 exchangeable proton

not observed.

HRMS ESI-TOF  $m/z$  calculated for  $C_{22}H_{20}FN_2O_3$   $[M+H]^+$  379.1452. Found 379.1447.

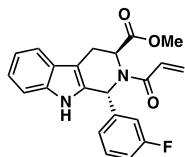

**methyl (1R,3S)-2-acryloyl-1-(3-fluorophenyl)-2,3,4,9-tetrahydro-1H-pyrido[3,4-b]indole-3-carboxylate (WX-03-58)**

$^1H$  NMR (600 MHz,  $CDCl_3$ )  $\delta$  8.19 – 7.72 (m, 0.4H), 7.53 (d,  $J = 7.7$  Hz, 1H), 7.39 – 7.21 (m, 2.6H), 7.19 (d,  $J = 7.6$  Hz, 1H), 7.16 (t,  $J = 7.5$  Hz, 1H), 7.12 (t,  $J = 7.4$  Hz, 1H), 7.10 – 7.01 (m, 1H), 7.02 – 6.83 (m, 1H), 6.58 – 6.48 (m, 1H), 6.29 (d,  $J = 16.6$  Hz, 1H), 6.20 (s, 1H), 5.65 (s, 1H), 5.18 (s, 1H), 3.63 (s, 4H), 3.52 – 3.11 (m, 1H).

$^{13}C$  NMR (151 MHz,  $CDCl_3$ )  $\delta$  171.55, 169.00, 164.07, 162.43, 144.40, 136.84, 136.69, 131.07, 130.42, 129.53, 128.41, 126.38, 122.68, 122.35, 120.10, 118.66, 115.39, 114.61, 113.79, 113.65, 111.32, 111.27, 107.81, 105.11, 57.34, 56.62, 54.33, 52.84, 24.18, 22.84.

$^{19}F$  NMR (376 MHz,  $CDCl_3$ )  $\delta$  -113.57, -115.15.

HRMS ESI-TOF  $m/z$  calculated for  $C_{22}H_{20}FN_2O_3$   $[M+H]^+$  379.1452. Found 379.1449.

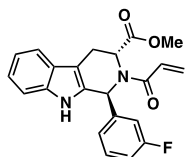

**methyl (1S,3R)-2-acryloyl-1-(3-fluorophenyl)-2,3,4,9-tetrahydro-1H-pyrido[3,4-b]indole-3-carboxylate (WX-03-60)**

$^1H$  NMR (600 MHz,  $CDCl_3$ )  $\delta$  8.04 – 7.68 (m, 1H), 7.53 (dd,  $J = 7.8$ , 1.2 Hz, 1H), 7.40 – 7.22 (m, 2H), 7.19 (dt,  $J = 7.7$ , 1.3 Hz, 1H), 7.16 (t,  $J = 7.5$  Hz, 1H), 7.12 (ddd,  $J = 8.0$ , 7.0, 1.1 Hz, 1H), 7.10 – 7.01 (m, 1H), 7.00 – 6.82 (m, 1H), 6.59 –

6.45 (m, 1H), 6.29 (dd,  $J = 16.5$ , 1.6 Hz, 1H), 6.19 (s, 1H), 5.76 – 5.56 (m, 1H), 5.19 (d,  $J = 5.4$  Hz, 1H), 3.63 (s, 4H), 3.51 – 3.17 (m, 1H).

HRMS ESI-TOF  $m/z$  calculated for  $C_{22}H_{20}FN_2O_3$   $[M+H]^+$  379.1452. Found 379.1464.

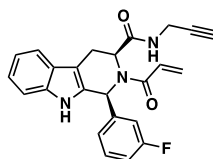

**(1S,3S)-2-acryloyl-1-(3-fluorophenyl)-N-(prop-2-yn-1-yl)-2,3,4,9-tetrahydro-1H-pyrido[3,4-b]indole-3-carboxamide (WX-03-338)**

$^1H$  NMR (400 MHz,  $CD_3OD$ )  $\delta$  7.54 (d,  $J = 7.8$  Hz, 1H), 7.30 (d,  $J = 7.9$  Hz, 2H), 7.25 – 7.06 (m, 3H), 7.11 (ddd,  $J = 8.2, 7.1, 1.3$  Hz, 1H), 7.04 (ddd,  $J = 8.0, 7.1, 1.1$  Hz, 1H), 7.02 – 6.96 (m, 1H), 6.97 – 6.88 (m, 1H), 6.32 (d,  $J = 16.7$  Hz, 1H), 5.85 (dd,  $J = 10.7, 1.8$  Hz, 1H), 5.27 – 5.18 (m, 1H), 3.82 – 3.36 (m, 2H), 3.23 – 2.80 (m, 2H), 2.47 (s, 1H), 2 exchangeable protons not observed.

$^{13}C$  NMR (151 MHz,  $CD_3OD$ )  $\delta$  170.53, 164.96, 163.33, 144.19, 138.28, 131.01, 130.01, 129.45, 127.46, 125.76, 122.98, 120.15, 119.15, 116.98, 115.86, 115.72, 112.17, 108.23, 80.14, 72.17, 55.93, 52.98, 29.66, 22.60.

$^{19}F$  NMR (376 MHz,  $CD_3OD$ )  $\delta$  -116.90, -117.71.

HRMS ESI-TOF  $m/z$  calculated for  $C_{24}H_{21}FN_3O_2$   $[M+H]^+$  402.1612. Found 402.1613.

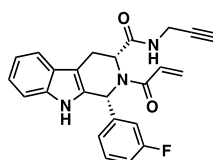

**(1R,3R)-2-acryloyl-1-(3-fluorophenyl)-N-(prop-2-yn-1-yl)-2,3,4,9-tetrahydro-1H-pyrido[3,4-b]indole-3-carboxamide (WX-03-340)**

$^1H$  NMR (400 MHz,  $CD_3OD$ )  $\delta$  7.53 (d,  $J = 7.8$  Hz, 1H), 7.30 (d,  $J = 7.9$  Hz, 2H), 7.27 – 7.04 (m, 3H), 7.11 (ddd,  $J = 8.2, 7.1, 1.3$  Hz, 1H), 7.04 (ddd,  $J = 7.9, 7.1, 1.1$  Hz, 1H), 7.02 – 6.96 (m, 1H), 6.97 – 6.88 (m, 1H), 6.32 (d,  $J = 16.7$  Hz, 1H), 5.84 (dd,  $J = 10.7, 1.8$  Hz, 1H), 5.33 – 5.13 (m, 1H), 3.89 – 3.34 (m, 2H), 3.25 – 2.82 (m, 2H), 2.47 (s, 1H), 2 exchangeable protons not observed.

HRMS ESI-TOF  $m/z$  calculated for  $C_{24}H_{21}FN_3O_2$   $[M+H]^+$  402.1612. Found 402.1625.

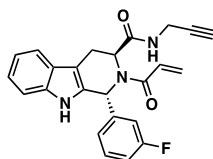

**(1R,3S)-2-acryloyl-1-(3-fluorophenyl)-N-(prop-2-yn-1-yl)-2,3,4,9-tetrahydro-1H-pyrido[3,4-b]indole-3-carboxamide (WX-03-339)**

$^1H$  NMR (400 MHz,  $CD_3OD$ )  $\delta$  7.42 (d,  $J = 7.8$  Hz, 1H), 7.38 – 7.11 (m, 4H), 7.04 (t,  $J = 7.5$  Hz, 1H), 6.99 – 6.81 (m, 1H), 6.97 (ddd,  $J = 8.0, 7.0, 1.1$  Hz, 1H), 6.77 – 6.57 (m, 1H), 6.39 (s, 1H), 6.16 (br. d,  $J = 16.4$  Hz, 1H), 5.77 – 5.52 (m, 1H), 5.45 – 5.26 (m, 1H), 3.89 – 3.69 (m, 2H), 3.63 – 3.38 (m, 2H), 2.40 (t,  $J = 2.5$  Hz, 1H), 2 exchangeable protons not observed.

$^{13}C$  NMR (151 MHz,  $CD_3OD$ )  $\delta$  173.61, 171.15, 171.05, 170.76, 165.15, 163.68, 163.59, 147.59, 147.31, 138.32, 135.35, 133.93, 132.04, 131.12, 130.33, 130.00, 129.30, 128.94, 127.46, 127.42, 122.92, 122.72, 120.19, 118.78, 115.44, 114.59, 114.11, 112.19, 105.73, 104.32, 104.27, 80.36, 72.04, 59.27, 58.67, 57.98, 57.24, 29.72, 25.61, 24.43.

$^{19}F$  NMR (376 MHz,  $CD_3OD$ )  $\delta$  -116.36, -118.07.

HRMS ESI-TOF  $m/z$  calculated for  $C_{24}H_{21}FN_3O_2$   $[M+H]^+$  402.1612. Found 402.1614.

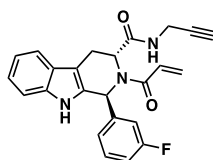

**(1S,3R)-2-acryloyl-1-(3-fluorophenyl)-N-(prop-2-yn-1-yl)-2,3,4,9-tetrahydro-1H-pyrido[3,4-b]indole-3-carboxamide (WX-03-341)**

$^1H$  NMR (400 MHz,  $CD_3OD$ )  $\delta$  7.43 (s, 1H), 7.38 – 7.11 (m, 4H), 7.04 (t,  $J = 7.5$  Hz, 1H), 6.99 – 6.81 (m, 1H), 6.97 (ddd,  $J = 7.9, 7.0, 1.1$  Hz, 1H), 6.80 – 6.54 (m, 1H), 6.39 (br. s, 1H), 6.16 (br. d,  $J = 16.8$  Hz, 1H), 5.79 – 5.51 (m, 1H), 5.45 – 5.24 (m, 1H), 3.91 – 3.67 (m, 2H), 3.62 – 3.38 (m, 2H), 2.41 (t,  $J = 2.5$  Hz, 1H), 2 exchangeable protons not observed.

HRMS ESI-TOF  $m/z$  calculated for  $C_{24}H_{21}FN_3O_2$   $[M+H]^+$  402.1612. Found 402.1614.

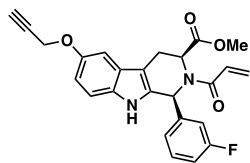

**methyl (1S,3S)-2-acryloyl-1-(3-fluorophenyl)-6-(prop-2-yn-1-yloxy)-2,3,4,9-tetrahydro-1H-pyrido[3,4-b]indole-3-carboxylate (WX-03-346)**

$^1\text{H}$  NMR (400 MHz,  $\text{CD}_3\text{OD}$ )  $\delta$  7.40 – 7.24 (m, 1H), 7.21 (d,  $J$  = 8.7 Hz, 1H), 7.15 (d,  $J$  = 2.4 Hz, 1H), 7.11 – 6.87 (m, 5H), 6.85 (dd,  $J$  = 8.8, 2.5 Hz, 1H), 6.29 (d,  $J$  = 16.8 Hz, 1H), 5.84 (d,  $J$  = 10.9 Hz, 1H), 5.34 (d,  $J$  = 6.8 Hz, 1H),

4.75 (d,  $J$  = 2.4 Hz, 2H), 4.59 (s, 1H), 3.66 – 3.47 (m, 1H), 3.19 – 2.95 (m, 3H), 2.91 (t,  $J$  = 2.4 Hz, 1H), 1 exchangeable proton not observed.

$^{13}\text{C}$  NMR (151 MHz,  $\text{CD}_3\text{OD}$ )  $\delta$  172.11, 170.14, 164.84, 163.23, 153.38, 143.97, 143.92, 133.99, 131.24, 130.76, 130.76, 130.08, 129.15, 127.78, 126.13, 124.72, 117.25, 117.10, 115.85, 115.71, 113.80, 112.80, 108.05, 103.63, 80.58, 76.26, 57.84, 56.57, 54.62, 52.96, 52.53, 52.43, 22.61.

$^{19}\text{F}$  NMR (376 MHz,  $\text{CD}_3\text{OD}$ )  $\delta$  -117.10, -118.06.

HRMS ESI-TOF  $m/z$  calculated for  $\text{C}_{25}\text{H}_{22}\text{FN}_2\text{O}_4$   $[\text{M}+\text{H}]^+$  433.1558. Found 433.1564.

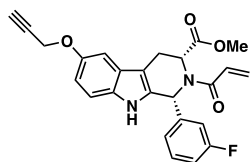

**methyl (1R,3R)-2-acryloyl-1-(3-fluorophenyl)-6-(prop-2-yn-1-yloxy)-2,3,4,9-tetrahydro-1H-pyrido[3,4-b]indole-3-carboxylate (WX-03-348)**

$^1\text{H}$  NMR (400 MHz,  $\text{CD}_3\text{OD}$ )  $\delta$  7.35 – 7.22 (m, 1H), 7.21 (d,  $J$  = 8.8 Hz, 1H), 7.17 – 7.12 (m, 1H), 7.10 – 6.87 (m, 5H), 6.85 (dd,  $J$  = 8.8, 2.5 Hz, 1H), 6.29 (d,  $J$  = 16.9 Hz, 1H), 5.84 (d,  $J$  = 10.9 Hz, 1H), 5.42 – 5.22 (m, 1H), 4.79 –

4.68 (m, 2H), 4.65 – 4.52 (m, 1H), 3.58 (d,  $J$  = 16.1 Hz, 1H), 3.14 – 2.95 (m, 3H), 2.91 (t,  $J$  = 2.4 Hz, 1H), 1 exchangeable proton not observed.

HRMS ESI-TOF  $m/z$  calculated for  $\text{C}_{25}\text{H}_{22}\text{FN}_2\text{O}_4$   $[\text{M}+\text{H}]^+$  433.1558. Found 433.1557.

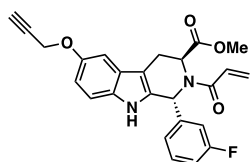

**methyl (1R,3S)-2-acryloyl-1-(3-fluorophenyl)-6-(prop-2-yn-1-yloxy)-2,3,4,9-tetrahydro-1H-pyrido[3,4-b]indole-3-carboxylate (WX-03-347)**

$^1\text{H}$  NMR (400 MHz,  $\text{CD}_3\text{OD}$ )  $\delta$  7.47 – 7.09 (m, 4H), 7.05 (d,  $J$  = 2.4 Hz, 1H), 7.05 – 6.64 (m, 3H), 6.41 – 6.04 (m, 2H), 5.70 (dd,  $J$  = 10.5, 1.8 Hz, 1H), 5.59 – 5.44 (m, 0.5H), 5.06 (s, 0.5H), 4.70 (d,  $J$  = 2.4 Hz, 2H), 4.59 (s, 0.5H),

3.72 – 3.50 (m, 3H), 3.50 – 3.38 (m, 1H), 3.26 – 3.12 (m, 0.5H), 2.89 (t,  $J$  = 2.4 Hz, 1H), mixture of rotamers, 1 exchangeable proton not observed.

$^{13}\text{C}$  NMR (151 MHz,  $\text{CD}_3\text{OD}$ )  $\delta$  173.44, 172.92, 171.57, 170.50, 165.35, 165.02, 163.72, 163.42, 153.46, 147.55, 145.84, 135.98, 134.28, 134.05, 132.89, 131.97, 131.09, 130.43, 129.93, 129.58, 129.42, 128.92, 127.63, 126.12, 123.44, 123.24, 115.84, 115.70, 114.63, 114.48, 113.81, 113.47, 112.91, 111.38, 107.28, 105.18, 103.32, 80.50, 80.06, 76.26, 76.24, 76.01, 75.76, 58.85, 58.60, 57.89, 57.73, 55.82, 53.26, 52.88, 52.43, 24.85, 23.56, 22.61.

$^{19}\text{F}$  NMR (376 MHz,  $\text{CD}_3\text{OD}$ )  $\delta$  -116.51, -118.10.

HRMS ESI-TOF  $m/z$  calculated for  $\text{C}_{25}\text{H}_{22}\text{FN}_2\text{O}_4$   $[\text{M}+\text{H}]^+$  433.1558. Found 433.1571.

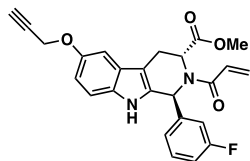

**methyl (1S,3R)-2-acryloyl-1-(3-fluorophenyl)-6-(prop-2-yn-1-yloxy)-2,3,4,9-tetrahydro-1H-pyrido[3,4-b]indole-3-carboxylate (WX-03-349)**

$^1\text{H}$  NMR (400 MHz,  $\text{CD}_3\text{OD}$ )  $\delta$  7.46 – 7.09 (m, 4H), 7.05 (d,  $J$  = 2.4 Hz, 1H), 7.03 – 6.61 (m, 3H), 6.41 – 6.03 (m, 2H), 5.70 (d,  $J$  = 10.6 Hz, 1H), 5.57 – 5.43 (m, 0.5H), 5.06 (s, 0.5H), 4.70 (d,  $J$  = 2.2 Hz, 2H), 4.64 – 4.55 (m, 0.5H),

3.73 – 3.50 (m, 3H), 3.50 – 3.36 (m, 1H), 3.27 – 3.12 (m, 0.5H), 2.89 (t,  $J$  = 2.4 Hz, 1H), mixture of rotamers, 1 exchangeable proton not observed.

HRMS ESI-TOF  $m/z$  calculated for  $\text{C}_{25}\text{H}_{22}\text{FN}_2\text{O}_4$   $[\text{M}+\text{H}]^+$  433.1558. Found 433.1570.

# Chiral-phase SFC data

## WX-01-06

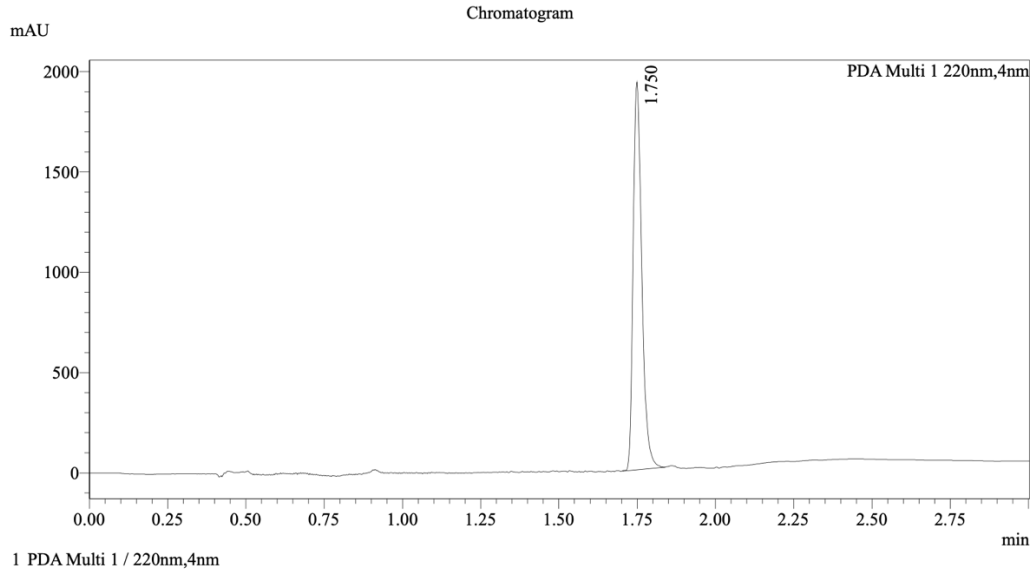

### Integration Result

#### Peak Table

| Peak# | Ret. Time | Height  | Height% | USP Width | Area    | Area%   |
|-------|-----------|---------|---------|-----------|---------|---------|
| 1     | 1.750     | 1905040 | 100.000 | 0.054     | 3713964 | 100.000 |

## WX-01-08

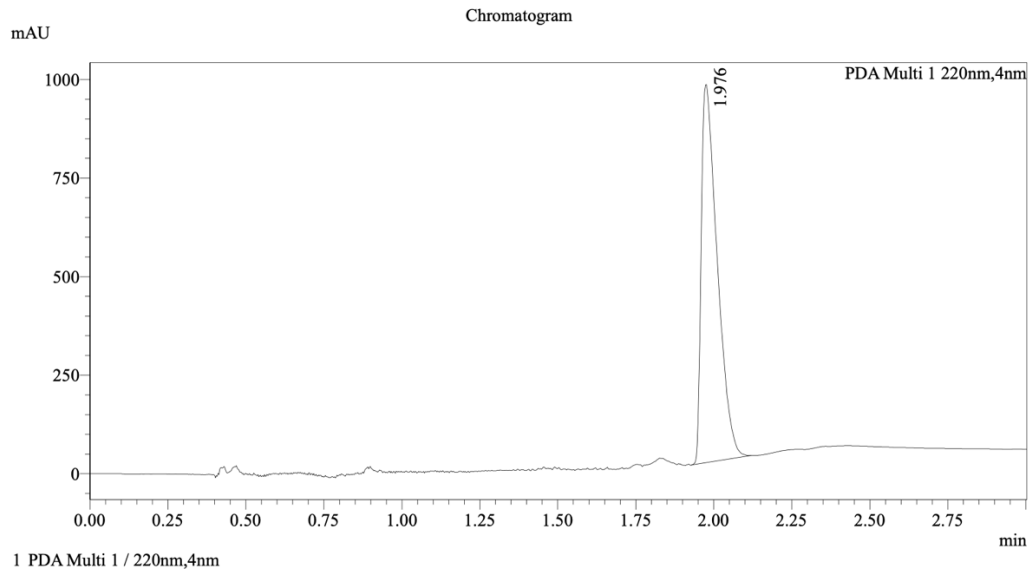

### Integration Result

#### Peak Table

| Peak# | Ret. Time | Height | Height% | USP Width | Area    | Area%   |
|-------|-----------|--------|---------|-----------|---------|---------|
| 1     | 1.976     | 952596 | 100.000 | 0.099     | 3428064 | 100.000 |



# Co-injection of WX-01-06 and WX-01-08

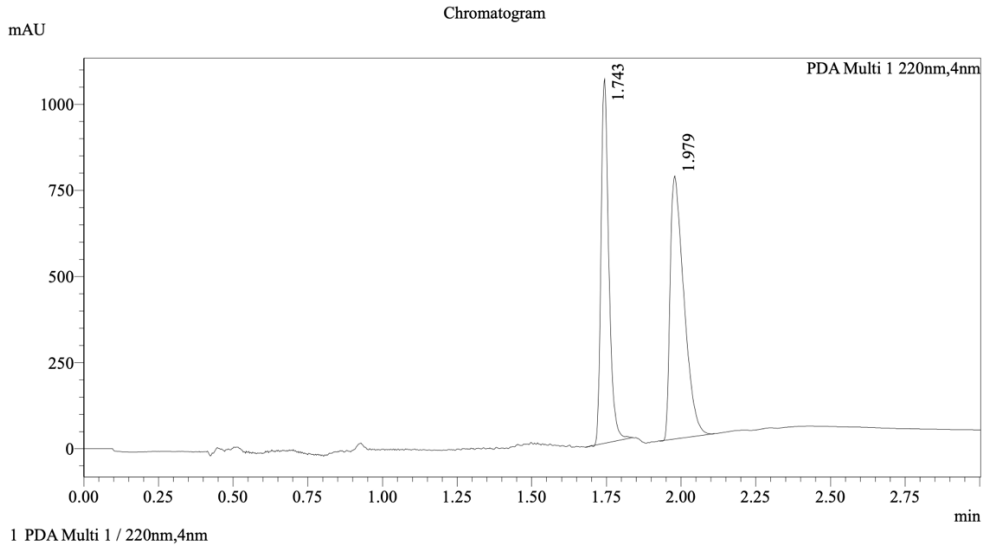

## Integration Result

| Peak Table |           |         |         |           |         |        |
|------------|-----------|---------|---------|-----------|---------|--------|
| Peak#      | Ret. Time | Height  | Height% | USP Width | Area    | Area%  |
| 1          | 1.743     | 1026143 | 57.741  | 0.051     | 1931744 | 43.967 |
| 2          | 1.979     | 750991  | 42.259  | 0.090     | 2461920 | 56.033 |

## Method details

Column: Cellucoat, 50 mm length × 4.6 mm internal diameter, 3 μm particle size.  
Mobile phase: A: supercritical CO<sub>2</sub>; B: EtOH (0.05% diethylamine).  
Gradient elution: 5% to 40% B.

# WX-01-01

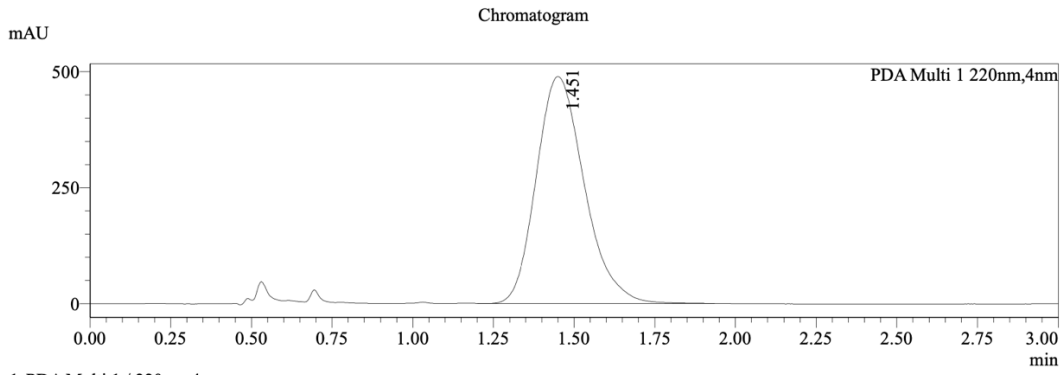

## Integration Result

### Peak Table

| Peak# | Ret. Time | Height | Height% | USP Width | Area    | Area%   |
|-------|-----------|--------|---------|-----------|---------|---------|
| 1     | 1.451     | 487999 | 100.000 | 0.270     | 5054551 | 100.000 |

# WX-01-03

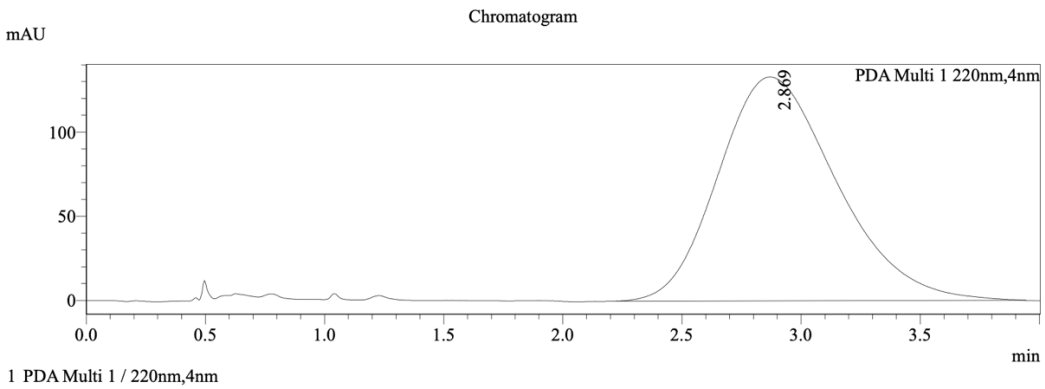

## Integration Result

### Peak Table

| Peak# | Ret. Time | Height | Height% | USP Width | Area    | Area%   |
|-------|-----------|--------|---------|-----------|---------|---------|
| 1     | 2.869     | 133048 | 100.000 | 0.914     | 4588203 | 100.000 |

## Co-injection of WX-01-01 and WX-01-03

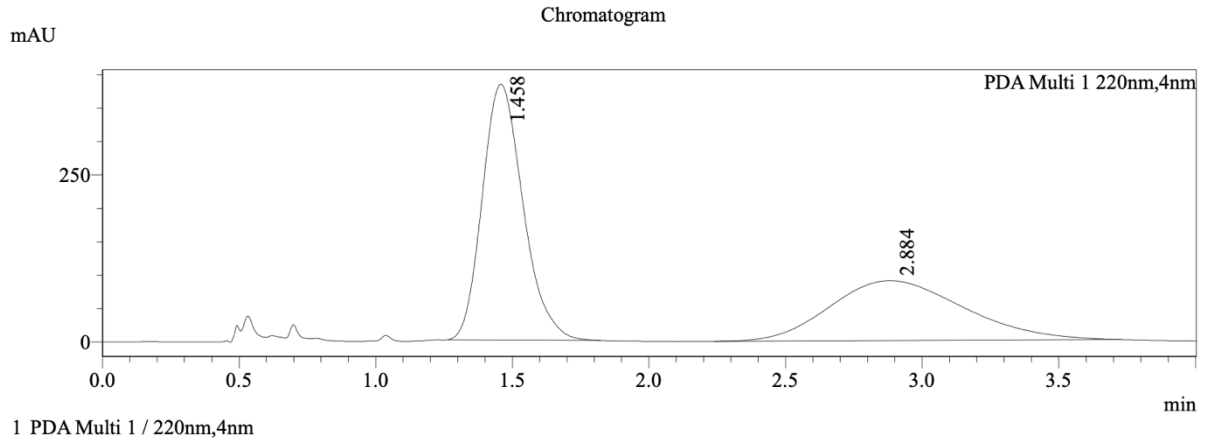

---

---

### Integration Result

---

---

| PDA Ch1 220nm |           | Peak Table |         |           |         |        |
|---------------|-----------|------------|---------|-----------|---------|--------|
| Peak#         | Ret. Time | Height     | Height% | USP Width | Area    | Area%  |
| 1             | 1.458     | 381902     | 80.992  | 0.272     | 3972117 | 56.539 |
| 2             | 2.884     | 89630      | 19.008  | 0.912     | 3053301 | 43.461 |

### Method details

Column: Chiralcel OJ-3, 50 mm length × 4.6 mm internal diameter, 3 μm particle size.

Mobile phase: A: supercritical CO<sub>2</sub>; B: MeOH (0.05% diethylamine).

Gradient elution: 40% B.

**WX-01-02**

Chromatogram

mAU

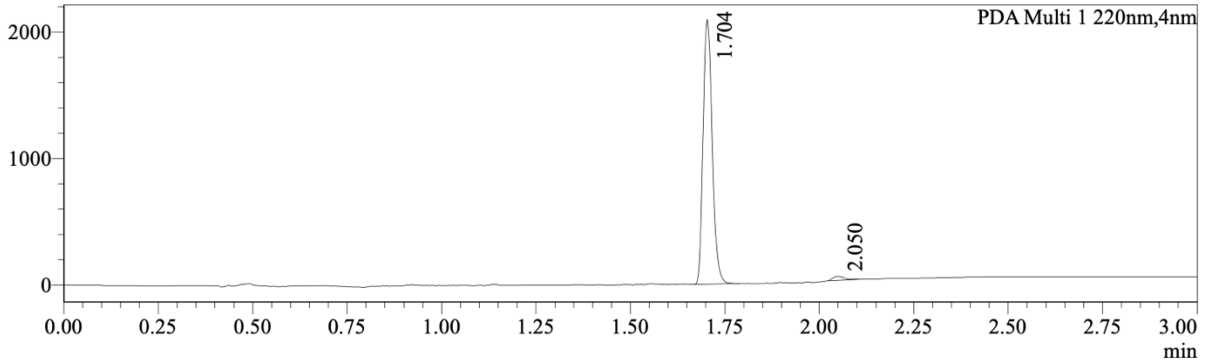

1 PDA Multi 1 / 220nm,4nm

Integration Result

Peak Table

| PDA Ch1 220nm |           |         |         |           |         |        |  |
|---------------|-----------|---------|---------|-----------|---------|--------|--|
| Peak#         | Ret. Time | Height  | Height% | USP Width | Area    | Area%  |  |
| 1             | 1.704     | 2019982 | 98.530  | 0.048     | 3530459 | 98.182 |  |
| 2             | 2.050     | 30139   | 1.470   | 0.057     | 65356   | 1.818  |  |

**WX-01-04**

Chromatogram

mAU

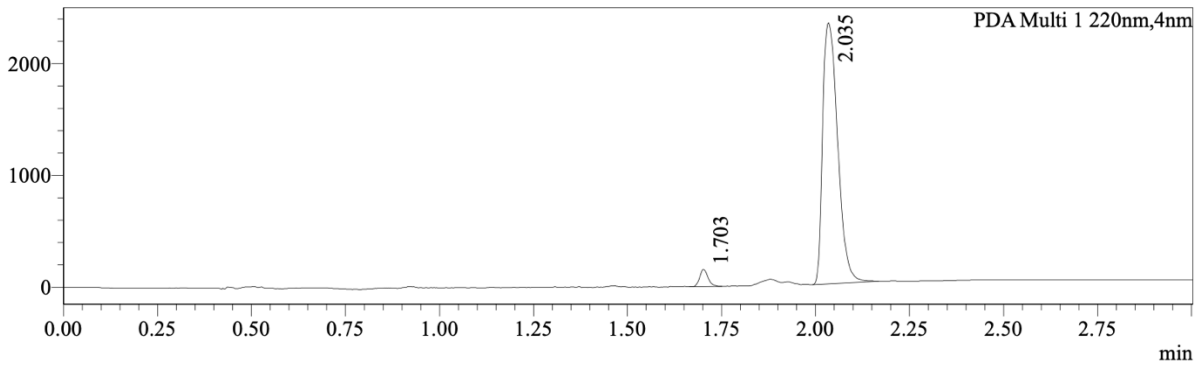

1 PDA Multi 1 / 220nm,4nm

Integration Result

Peak Table

| PDA Ch1 220nm |           |         |         |           |         |        |  |
|---------------|-----------|---------|---------|-----------|---------|--------|--|
| Peak#         | Ret. Time | Height  | Height% | USP Width | Area    | Area%  |  |
| 1             | 1.703     | 149386  | 6.084   | 0.045     | 235797  | 3.505  |  |
| 2             | 2.035     | 2305904 | 93.916  | 0.073     | 6491439 | 96.495 |  |

## Co-injection of WX-01-02 and WX-01-04

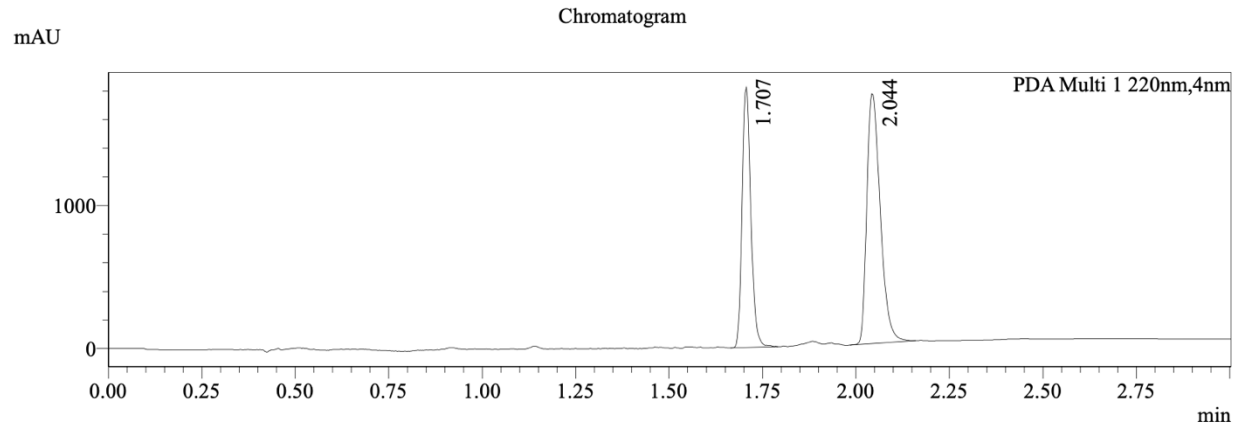

1 PDA Multi 1 / 220nm,4nm

---

---

### Integration Result

---

---

#### Peak Table

| Peak# | Ret. Time | Height  | Height% | USP Width | Area    | Area%  |
|-------|-----------|---------|---------|-----------|---------|--------|
| 1     | 1.707     | 1717724 | 49.850  | 0.047     | 2972701 | 40.468 |
| 2     | 2.044     | 1728058 | 50.150  | 0.068     | 4373160 | 59.532 |

### Method details

Column: Cellucoat, 50 mm length × 4.6 mm internal diameter, 3 μm particle size.

Mobile phase: A: supercritical CO<sub>2</sub>; B: EtOH (0.05% diethylamine).

Gradient elution: 5% to 40% B.

# WX-01-09

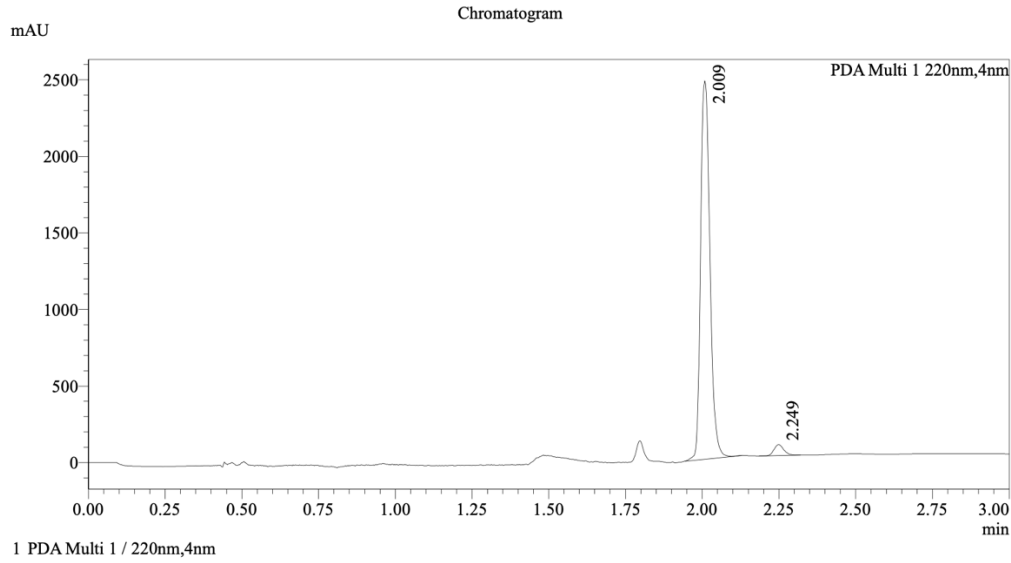

## Integration Result

### Peak Table

| Peak# | Ret. Time | Height  | Height% | USP Width | Area    | Area%  |
|-------|-----------|---------|---------|-----------|---------|--------|
| 1     | 2.009     | 2408696 | 97.232  | 0.057     | 5232029 | 97.034 |
| 2     | 2.249     | 68568   | 2.768   | 0.062     | 159918  | 2.966  |

# WX-01-11

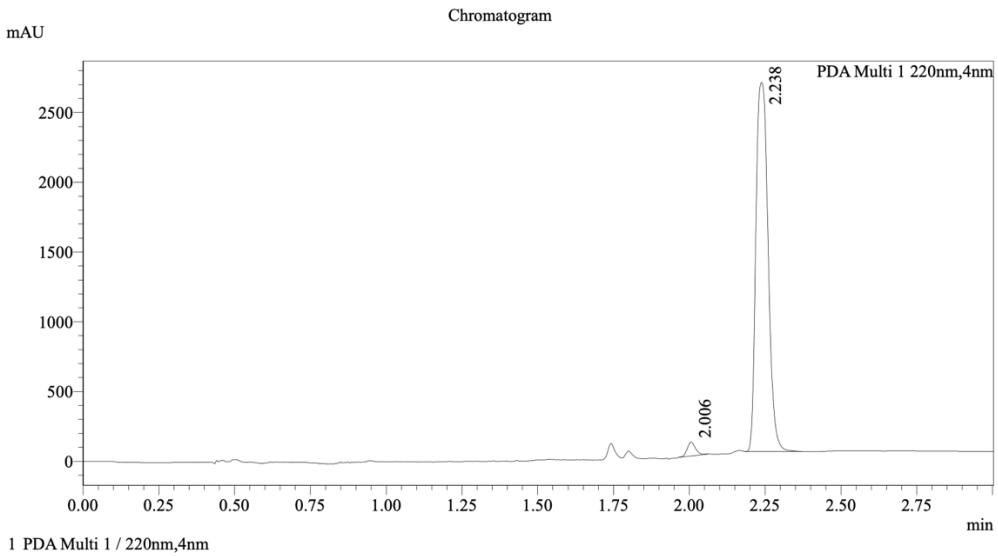

## Integration Result

### Peak Table

| Peak# | Ret. Time | Height  | Height% | USP Width | Area    | Area%  |
|-------|-----------|---------|---------|-----------|---------|--------|
| 1     | 2.006     | 97956   | 3.580   | 0.054     | 192365  | 2.536  |
| 2     | 2.238     | 2638171 | 96.420  | 0.071     | 7394082 | 97.464 |

# Co-injection of WX-01-09 and WX-01-11

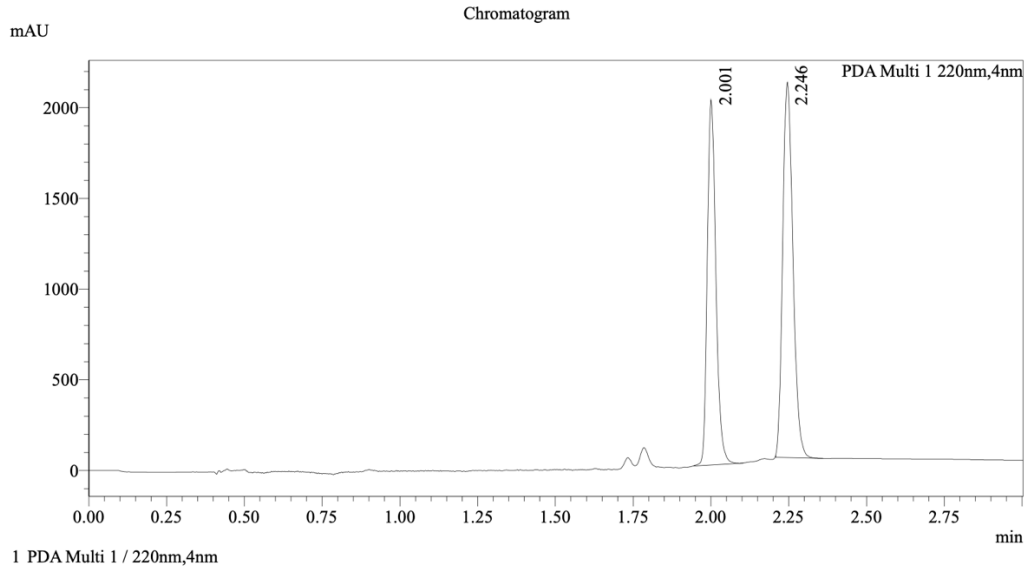

## Integration Result

| PDA Ch1 220nm |           | Peak Table |         |           |         |        |
|---------------|-----------|------------|---------|-----------|---------|--------|
| Peak#         | Ret. Time | Height     | Height% | USP Width | Area    | Area%  |
| 1             | 2.001     | 1923705    | 48.427  | 0.053     | 3866769 | 44.929 |
| 2             | 2.246     | 2048649    | 51.573  | 0.063     | 4739604 | 55.071 |

## Method details

Column: Cellucoat, 50 mm length × 4.6 mm internal diameter, 3 μm particle size.  
Mobile phase: A: supercritical CO<sub>2</sub>; B: EtOH (0.05% diethylamine).  
Gradient elution: 5% to 40% B.

# WX-02-26

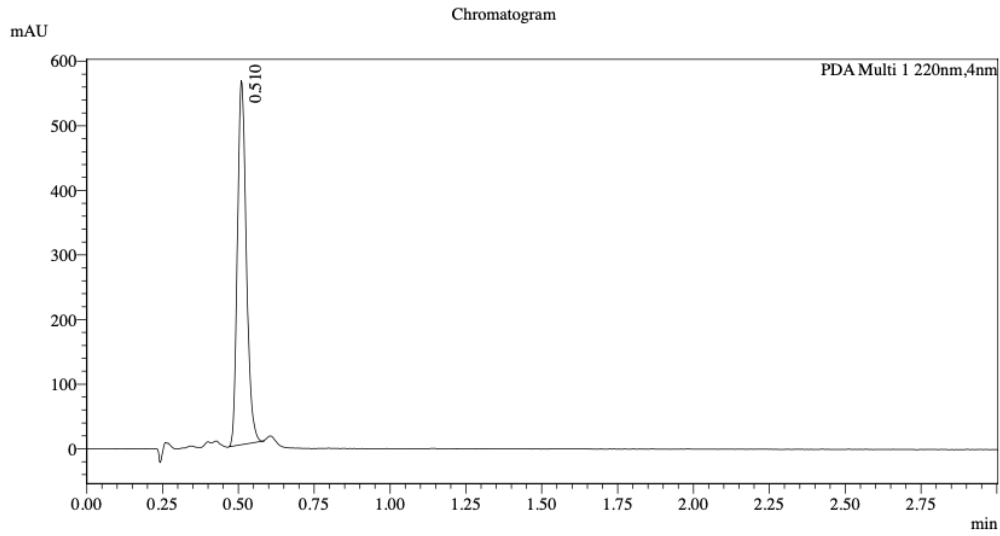

---

---

### Integration Result

---

---

#### Peak Table

| Peak# | Ret. Time | Height | Height% | Resolution(USP) | Area    | Area%   |
|-------|-----------|--------|---------|-----------------|---------|---------|
| 1     | 0.510     | 555996 | 100.000 | --              | 1156838 | 100.000 |

# WX-02-46

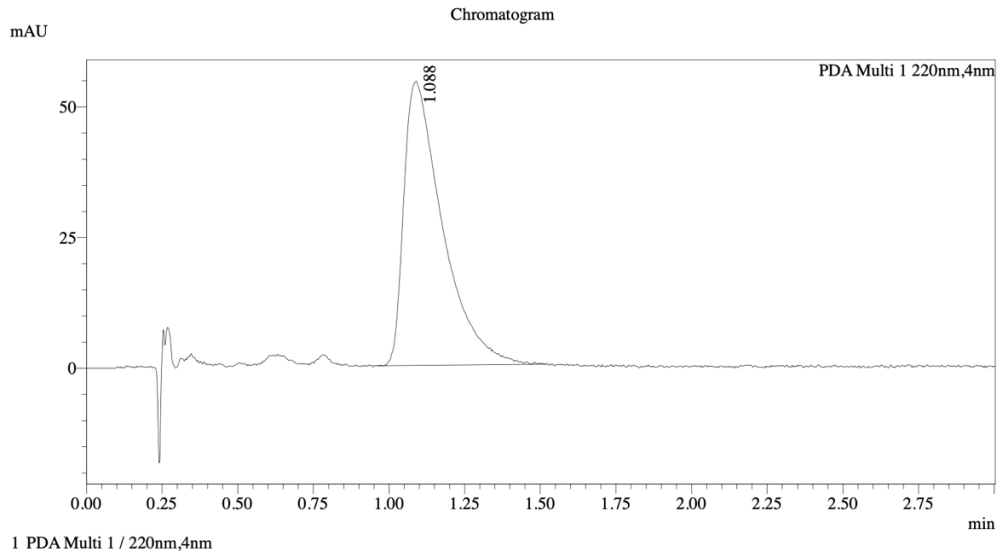

---

---

### Integration Result

---

---

#### Peak Table

| Peak# | Ret. Time | Height | Height% | Resolution(USP) | Area   | Area%   |
|-------|-----------|--------|---------|-----------------|--------|---------|
| 1     | 1.088     | 54104  | 100.000 | --              | 482608 | 100.000 |



# Co-injection of WX-02-26 and WX-02-46

Chromatogram

mAU

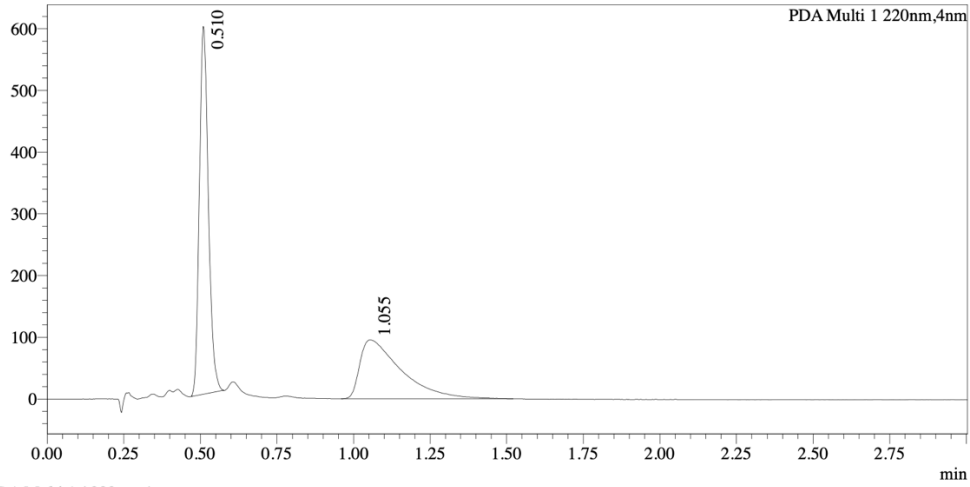

1 PDA Multi 1 / 220nm,4nm

---

---

## Integration Result

---

---

### Peak Table

| Peak# | Ret. Time | Height | Height% | Resolution(USP) | Area    | Area%  |
|-------|-----------|--------|---------|-----------------|---------|--------|
| 1     | 0.510     | 587360 | 86.025  | --              | 1219012 | 57.692 |
| 2     | 1.055     | 95422  | 13.975  | 3.678           | 893950  | 42.308 |

### Method details

Column: Chiralcel OD-3, 50 mm length × 4.6 mm internal diameter, 3 μm particle size.

Mobile phase: A: supercritical CO<sub>2</sub>; B: MeOH (0.05% diethylamine).

Gradient elution: 40% B.

### WX-03-57

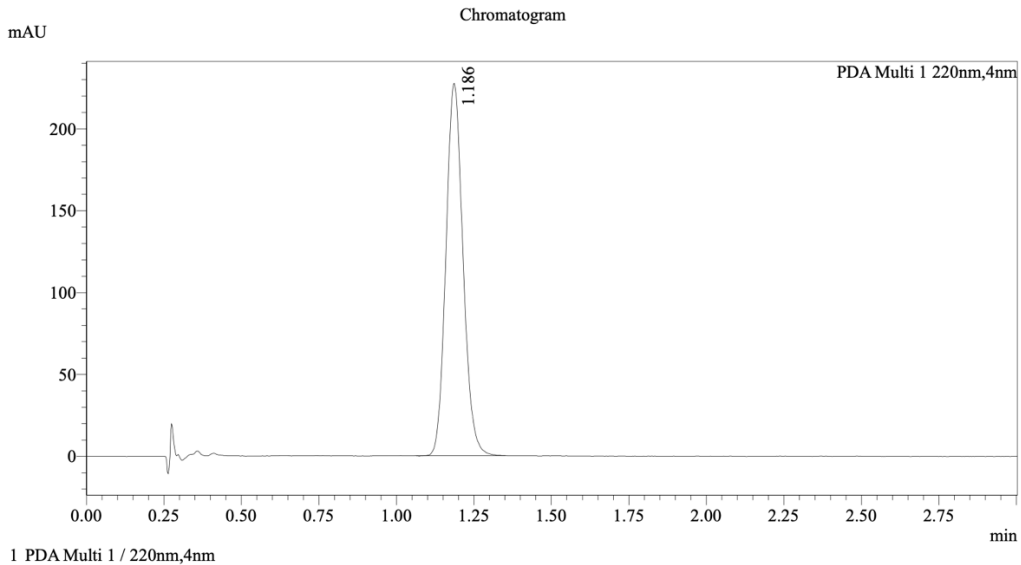

#### Integration Result

##### Peak Table

| Peak# | Ret. Time | Height | Height% | Resolution(USP) | Area   | Area%   |
|-------|-----------|--------|---------|-----------------|--------|---------|
| 1     | 1.186     | 224239 | 100.000 | --              | 871712 | 100.000 |

### WX-03-59

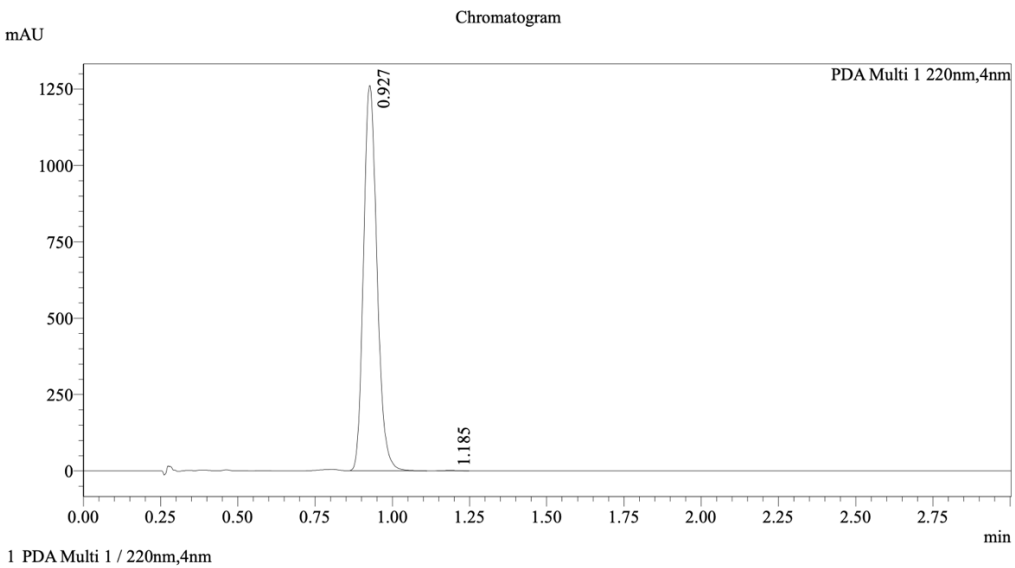

#### Integration Result

##### Peak Table

| Peak# | Ret. Time | Height  | Height% | Resolution(USP) | Area    | Area%  |
|-------|-----------|---------|---------|-----------------|---------|--------|
| 1     | 0.927     | 1252115 | 99.909  | --              | 3829419 | 99.906 |
| 2     | 1.185     | 1138    | 0.091   | 3.052           | 3598    | 0.094  |

# Co-injection of WX-03-57 and WX-03-59

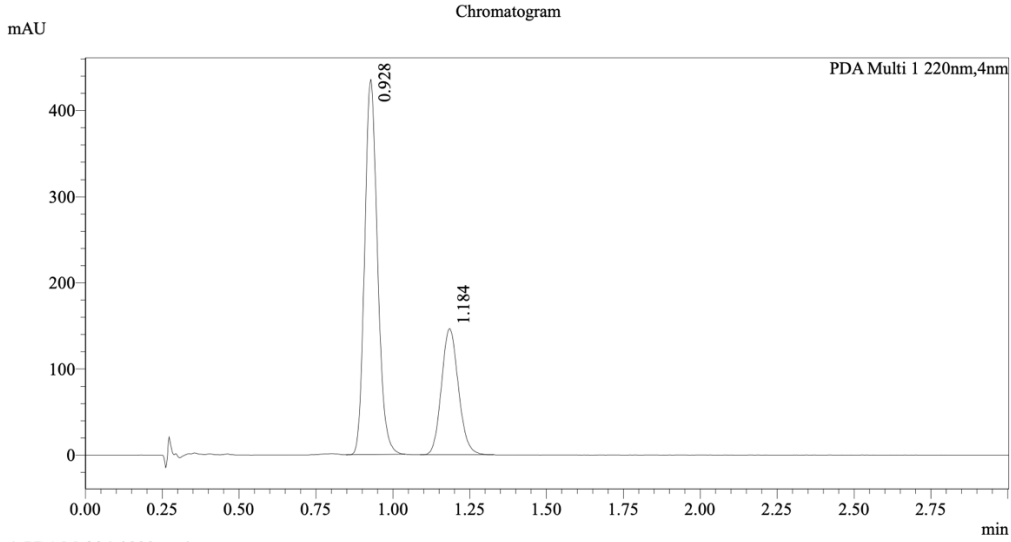

1 PDA Multi 1 / 220nm,4nm

---

---

## Integration Result

---

---

### Peak Table

| Peak# | Ret. Time | Height | Height% | Resolution(USP) | Area    | Area%  |
|-------|-----------|--------|---------|-----------------|---------|--------|
| 1     | 0.928     | 428737 | 74.734  | --              | 1265453 | 69.257 |
| 2     | 1.184     | 144947 | 25.266  | 2.826           | 561719  | 30.743 |

## Method details

Column: Chiralpak AD-3, 50 mm length × 4.6 mm internal diameter, 3 μm particle size.  
Mobile phase: A: supercritical CO<sub>2</sub>; B: 2:1 iPrOH/CH<sub>3</sub>CN (0.05% diethylamine).  
Gradient elution: 40% B.

# WX-03-58

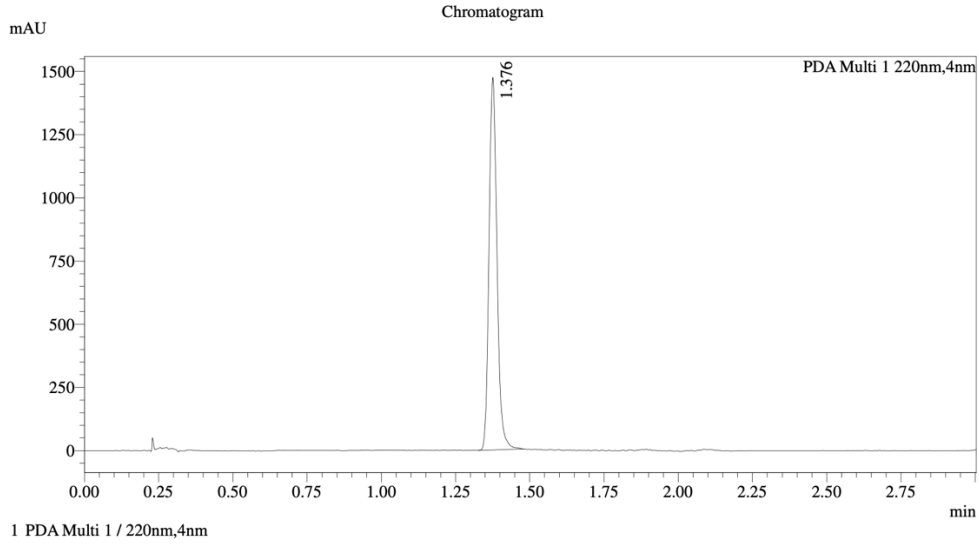

=====  
Integration Result  
=====

Peak Table

| Peak# | Ret. Time | Height  | Height% | Resolution(USP) | Area    | Area%   |
|-------|-----------|---------|---------|-----------------|---------|---------|
| 1     | 1.376     | 1425196 | 100.000 | --              | 2749839 | 100.000 |

# WX-03-60

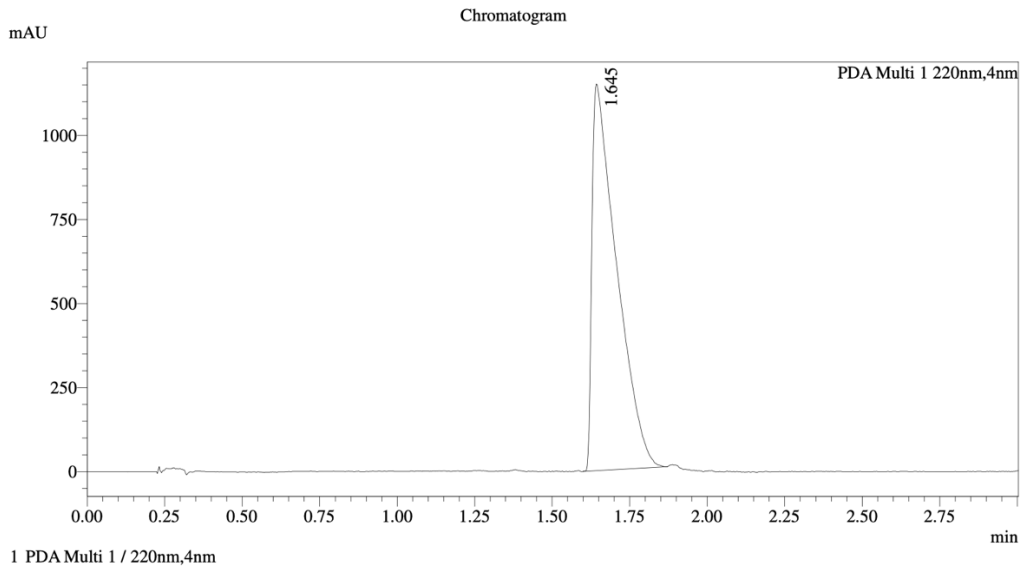

=====  
Integration Result  
=====

Peak Table

| Peak# | Ret. Time | Height  | Height% | Resolution(USP) | Area    | Area%   |
|-------|-----------|---------|---------|-----------------|---------|---------|
| 1     | 1.645     | 1142936 | 100.000 | --              | 6348111 | 100.000 |

# Co-injection of WX-03-58 and WX-03-60

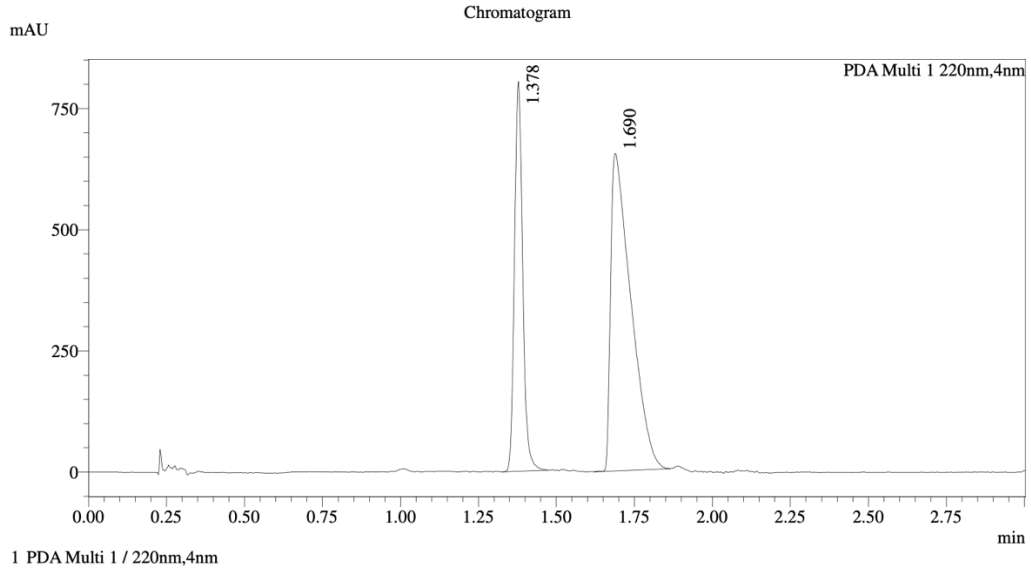

=====  
Integration Result  
=====

Peak Table

| Peak# | Ret. Time | Height | Height% | Resolution(USP) | Area    | Area%  |
|-------|-----------|--------|---------|-----------------|---------|--------|
| 1     | 1.378     | 764418 | 54.259  | --              | 1472704 | 33.280 |
| 2     | 1.690     | 644416 | 45.741  | 3.372           | 2952434 | 66.720 |

## Method details

Column: Chiralcel OD-3, 50 mm length × 4.6 mm internal diameter, 3 μm particle size.  
Mobile phase: A: supercritical CO<sub>2</sub>; B: MeOH (0.05% diethylamine).  
Gradient elution: 5% to 40% B.

# WX-03-338

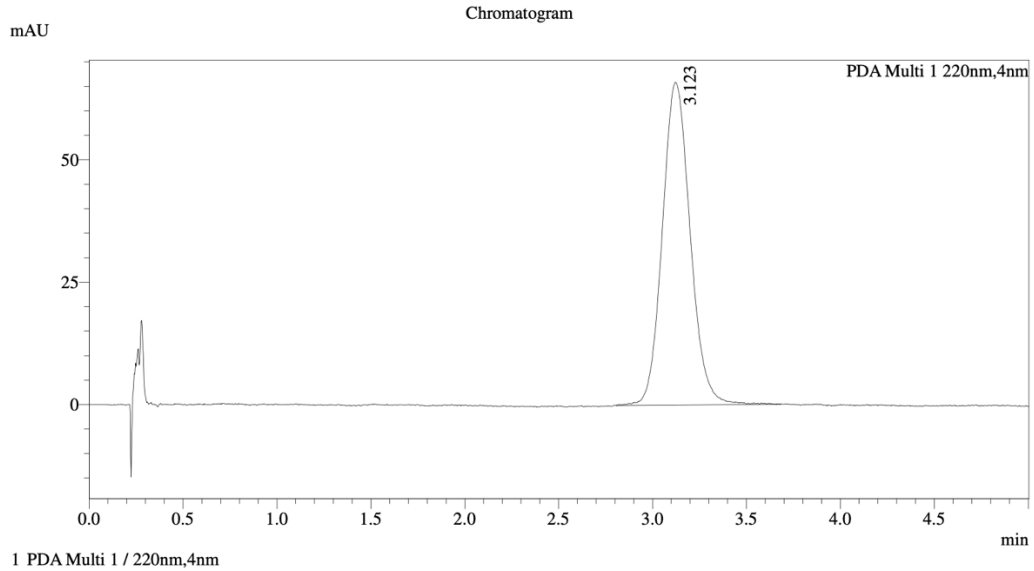

=====  
Integration Result  
=====

Peak Table

| Peak# | Ret. Time | Height | Height% | Resolution(USP) | Area   | Area%   |
|-------|-----------|--------|---------|-----------------|--------|---------|
| 1     | 3.123     | 65858  | 100.000 | --              | 680714 | 100.000 |

# WX-03-340

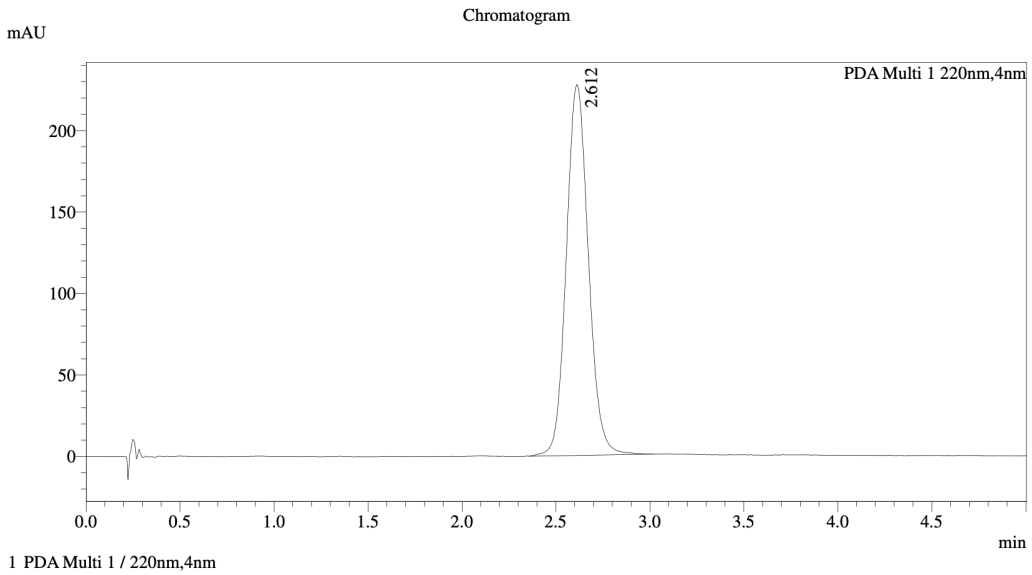

=====  
Integration Result  
=====

Peak Table

| Peak# | Ret. Time | Height | Height% | Resolution(USP) | Area    | Area%   |
|-------|-----------|--------|---------|-----------------|---------|---------|
| 1     | 2.612     | 227335 | 100.000 | --              | 1860721 | 100.000 |

## Co-injection of WX-03-338 and WX-03-340

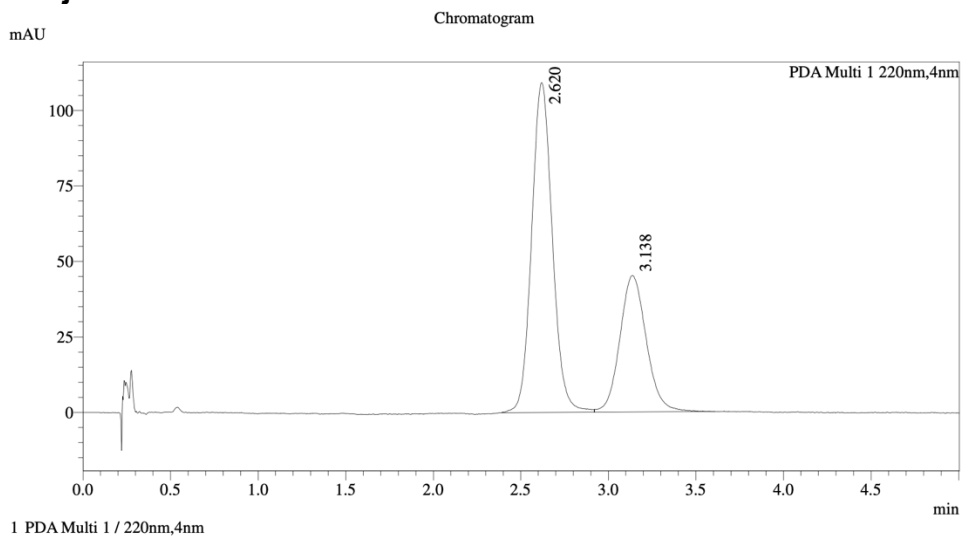

### Integration Result

| PDA Ch1 220nm |           | Peak Table |         |                 |        |        |  |
|---------------|-----------|------------|---------|-----------------|--------|--------|--|
| Peak#         | Ret. Time | Height     | Height% | Resolution(USP) | Area   | Area%  |  |
| 1             | 2.620     | 109128     | 70.761  | --              | 898749 | 65.388 |  |
| 2             | 3.138     | 45093      | 29.239  | 2.123           | 475728 | 34.612 |  |

### Method details

Column: Chiralcel OD-3, 50 mm length × 4.6 mm internal diameter, 3 μm particle size.  
Mobile phase: A: supercritical CO<sub>2</sub>; B: MeOH (0.05% diethylamine).  
Gradient elution: 20% B.

# WX-03-339

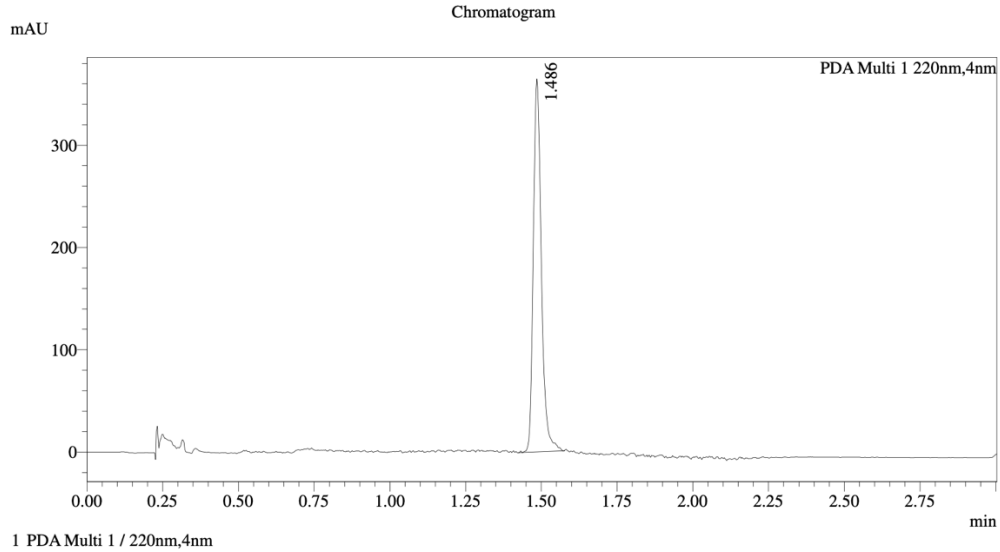

## Integration Result

### Peak Table

| Peak# | Ret. Time | Height | Height% | Resolution(USP) | Area   | Area%   |
|-------|-----------|--------|---------|-----------------|--------|---------|
| 1     | 1.486     | 358314 | 100.000 | --              | 672996 | 100.000 |

# WX-03-341

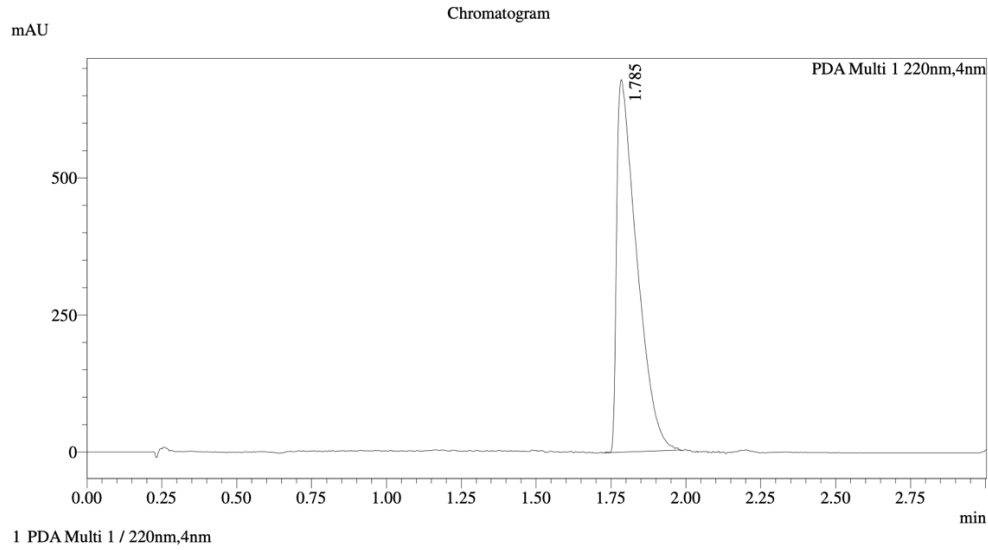

## Integration Result

### Peak Table

| Peak# | Ret. Time | Height | Height% | Resolution(USP) | Area    | Area%   |
|-------|-----------|--------|---------|-----------------|---------|---------|
| 1     | 1.785     | 671334 | 100.000 | --              | 3175821 | 100.000 |



## Co-injection of WX-03-339 and WX-03-341

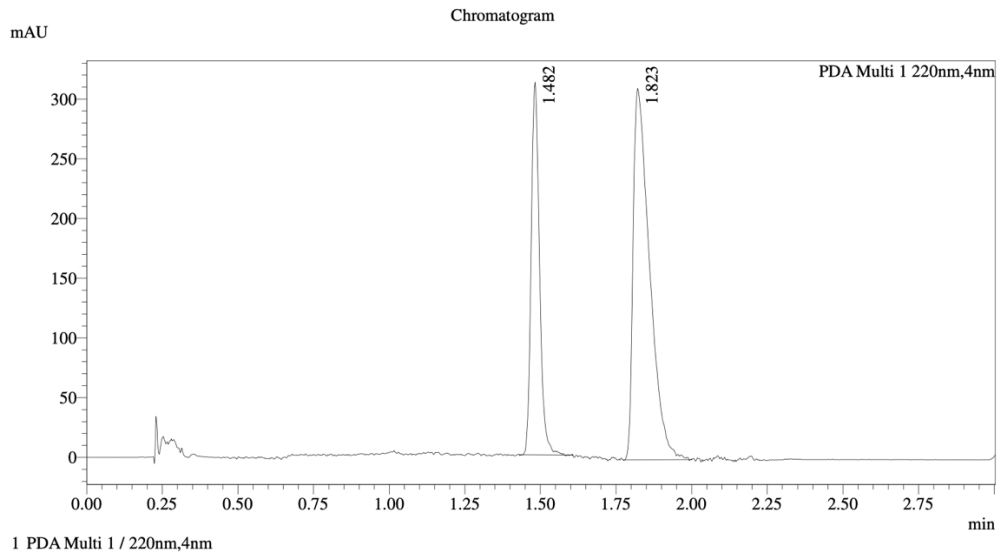

### Integration Result

#### Peak Table

| Peak# | Ret. Time | Height | Height% | Resolution(USP) | Area    | Area%  |
|-------|-----------|--------|---------|-----------------|---------|--------|
| 1     | 1.482     | 297604 | 49.079  | --              | 598984  | 33.696 |
| 2     | 1.823     | 308768 | 50.921  | 4.322           | 1178644 | 66.304 |

### Method details

Column: Chiralcel OD-3, 50 mm length × 4.6 mm internal diameter, 3 μm particle size.

Mobile phase: A: supercritical CO<sub>2</sub>; B: MeOH (0.05% diethylamine).

Gradient elution: 5% to 40% B.

WX-03-346

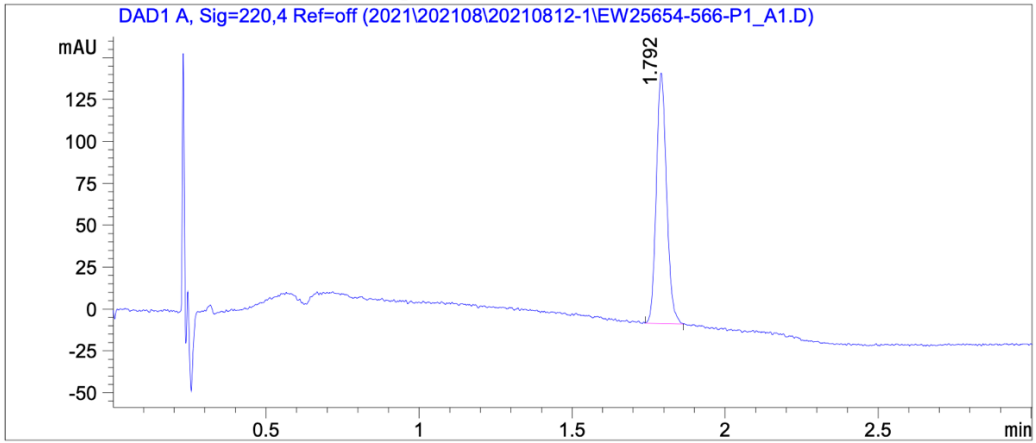

Signal: DAD1 A, Sig=220,4 Ref=off

| RetTime [min] | Height  | Resolution | Symm. | Area [mAU*s] | Area %  |
|---------------|---------|------------|-------|--------------|---------|
| 1.792         | 150.125 |            | 1.027 | 348.804      | 100.000 |

WX-03-348

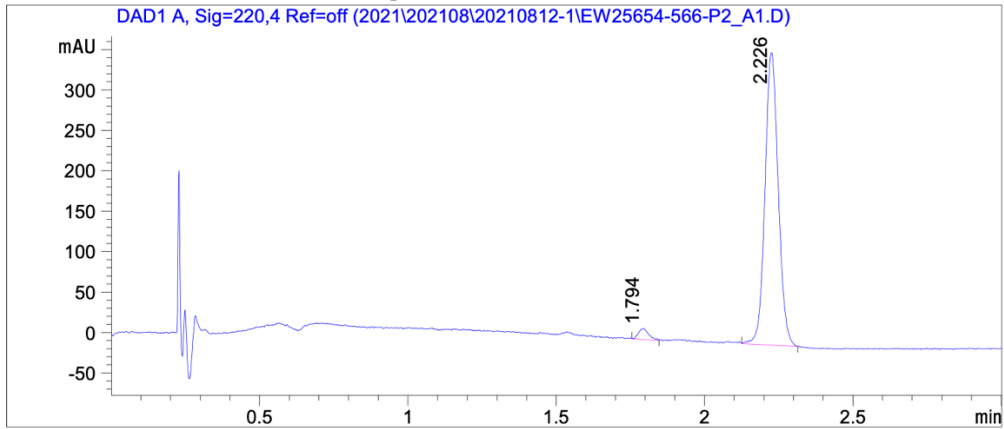

Signal: DAD1 A, Sig=220,4 Ref=off

| RetTime [min] | Height  | Resolution | Symm. | Area [mAU*s] | Area % |
|---------------|---------|------------|-------|--------------|--------|
| 1.794         | 13.644  |            | 1.079 | 32.489       | 2.808  |
| 2.226         | 363.449 | 6.148      | 0.922 | 1124.548     | 97.192 |

## Co-injection of WX-03-346 and WX-03-348

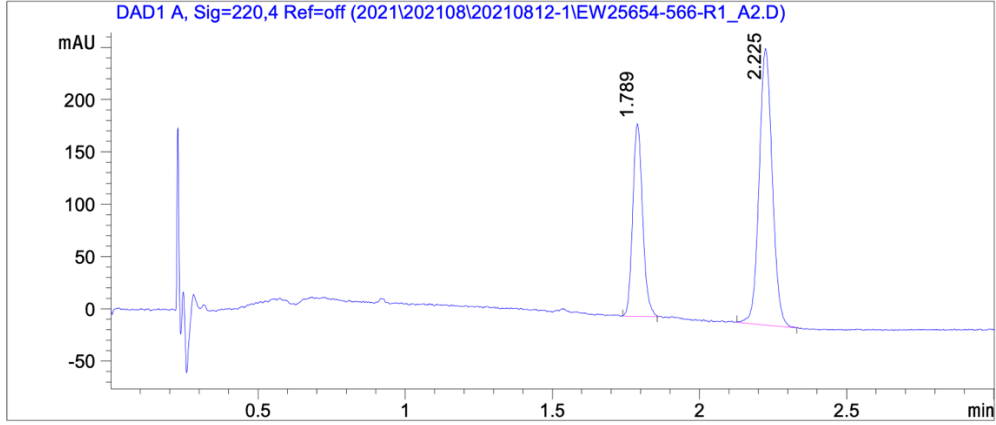

Signal: DAD1 A, Sig=220,4 Ref=off

| RetTime<br>[min] | Height  | Resolution | Symm. | Area<br>[mAU*s] | Area<br>% |
|------------------|---------|------------|-------|-----------------|-----------|
| 1.789            | 185.294 |            | 0.701 | 431.597         | 34.459    |
| 2.225            | 264.955 | 6.229      | 0.732 | 820.891         | 65.541    |

### Method details

Column: Chiralcel OD-3, 50 mm length × 4.6 mm internal diameter, 3 µm particle size.  
Mobile phase: A: supercritical CO<sub>2</sub>; B: MeOH (0.05% diethylamine).  
Gradient elution: 5% to 40% B.

**WX-03-347**

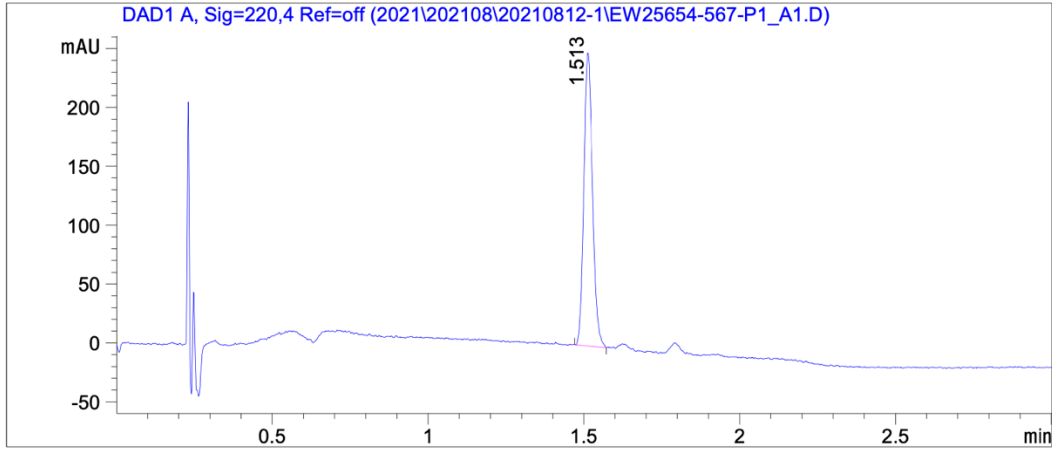

Signal: DAD1 A, Sig=220,4 Ref=off

| RetTime [min] | Height  | Resolution | Symm. | Area [mAU*s] | Area %  |
|---------------|---------|------------|-------|--------------|---------|
| 1.513         | 251.385 |            | 0.662 | 487.604      | 100.000 |

**WX-03-349**

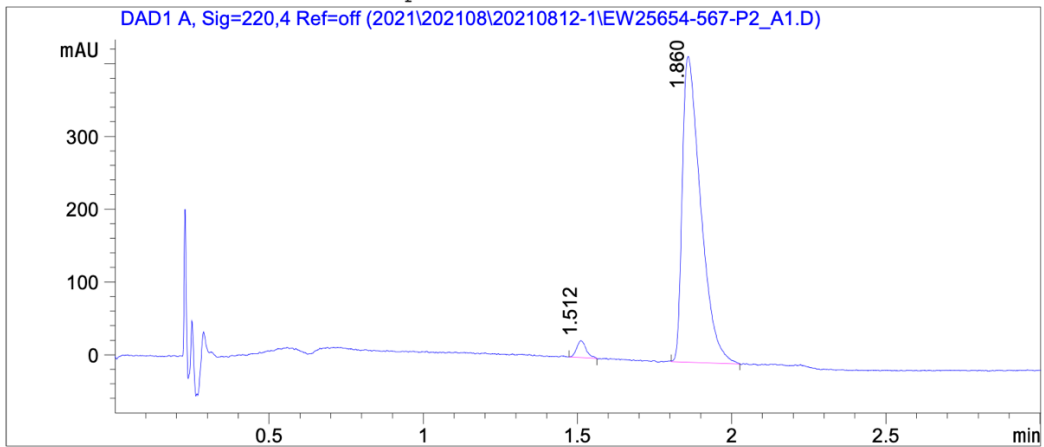

Signal: DAD1 A, Sig=220,4 Ref=off

| RetTime [min] | Height  | Resolution | Symm. | Area [mAU*s] | Area % |
|---------------|---------|------------|-------|--------------|--------|
| 1.512         | 22.907  |            | 0.966 | 49.571       | 2.772  |
| 1.860         | 421.790 | 4.358      | 0.420 | 1738.601     | 97.228 |

## Co-injection of WX-03-347 and WX-03-349

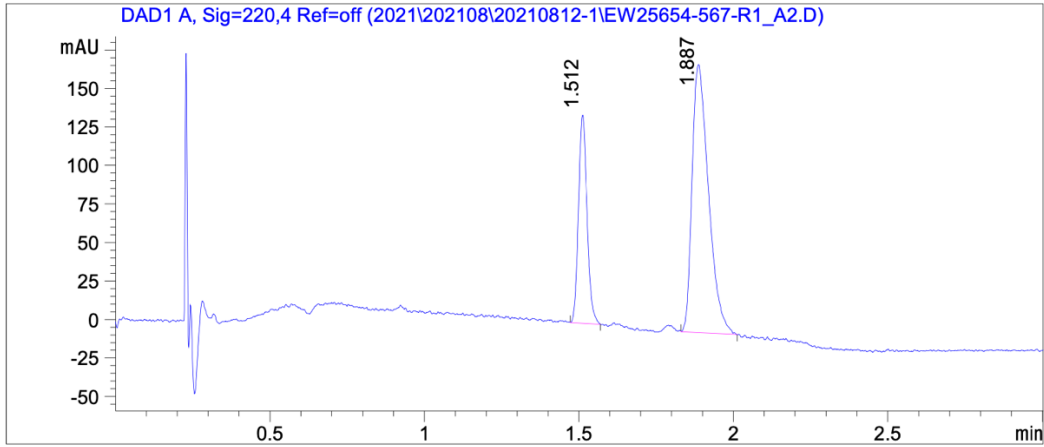

Signal: DAD1 A, Sig=220,4 Ref=off

| RetTime [min] | Height  | Resolution | Symm. | Area [mAU*s] | Area % |
|---------------|---------|------------|-------|--------------|--------|
| 1.512         | 136.681 |            | 0.973 | 265.104      | 29.194 |
| 1.887         | 174.238 | 5.110      | 0.513 | 642.985      | 70.806 |

### Method details

Column: Chiralcel OD-3, 50 mm length × 4.6 mm internal diameter, 3 μm particle size.  
Mobile phase: A: supercritical CO<sub>2</sub>; B: MeOH (0.05% diethylamine).  
Gradient elution: 5% to 40% B.





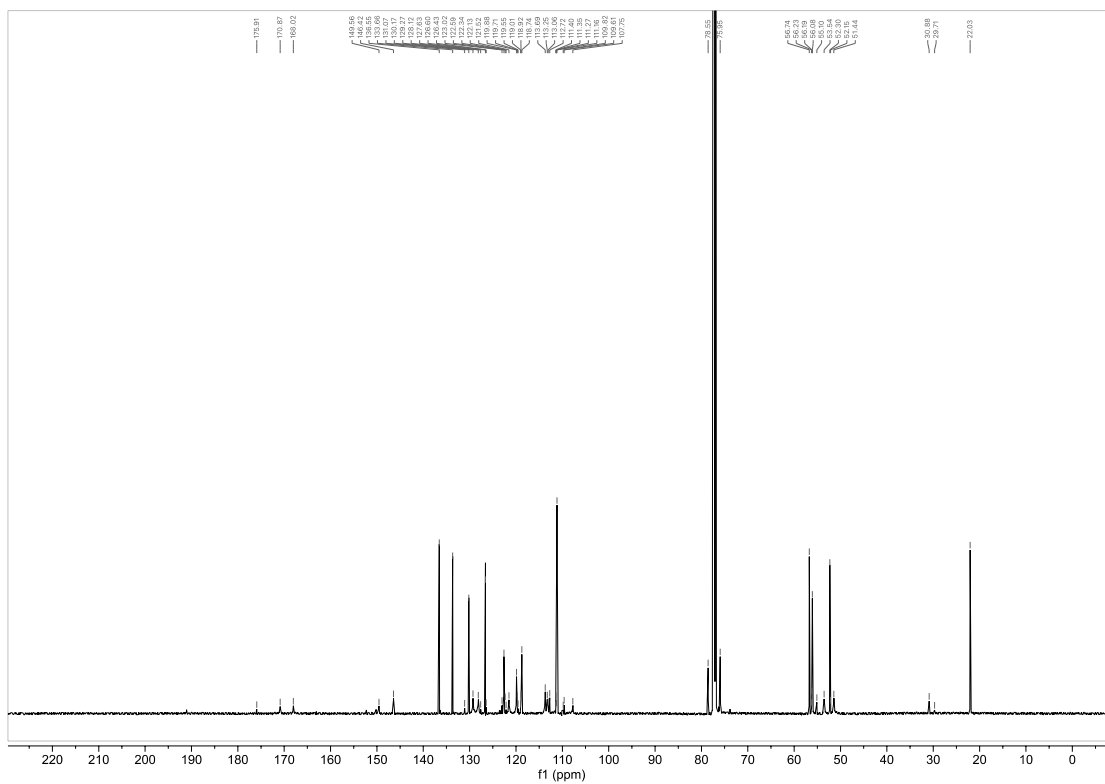

**<sup>13</sup>C NMR spectrum of WX-01-01 (CDCl<sub>3</sub>, 151 MHz)**

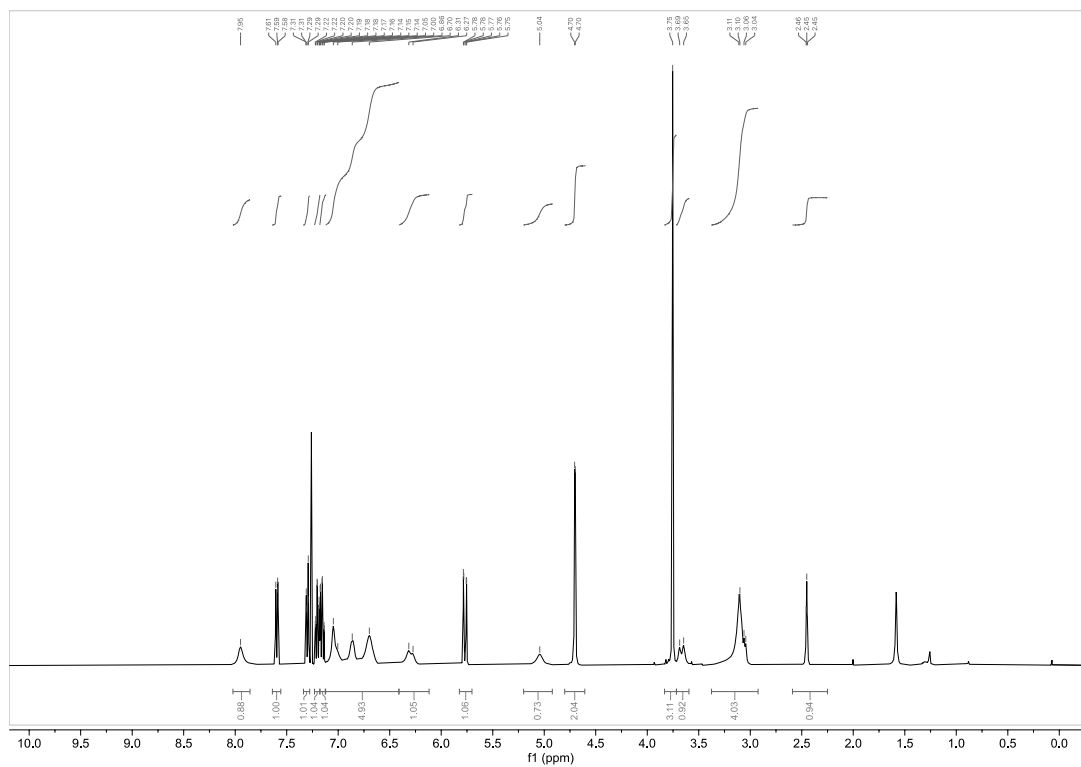

**<sup>1</sup>H NMR spectrum of WX-01-03 (CDCl<sub>3</sub>, 400 MHz)**





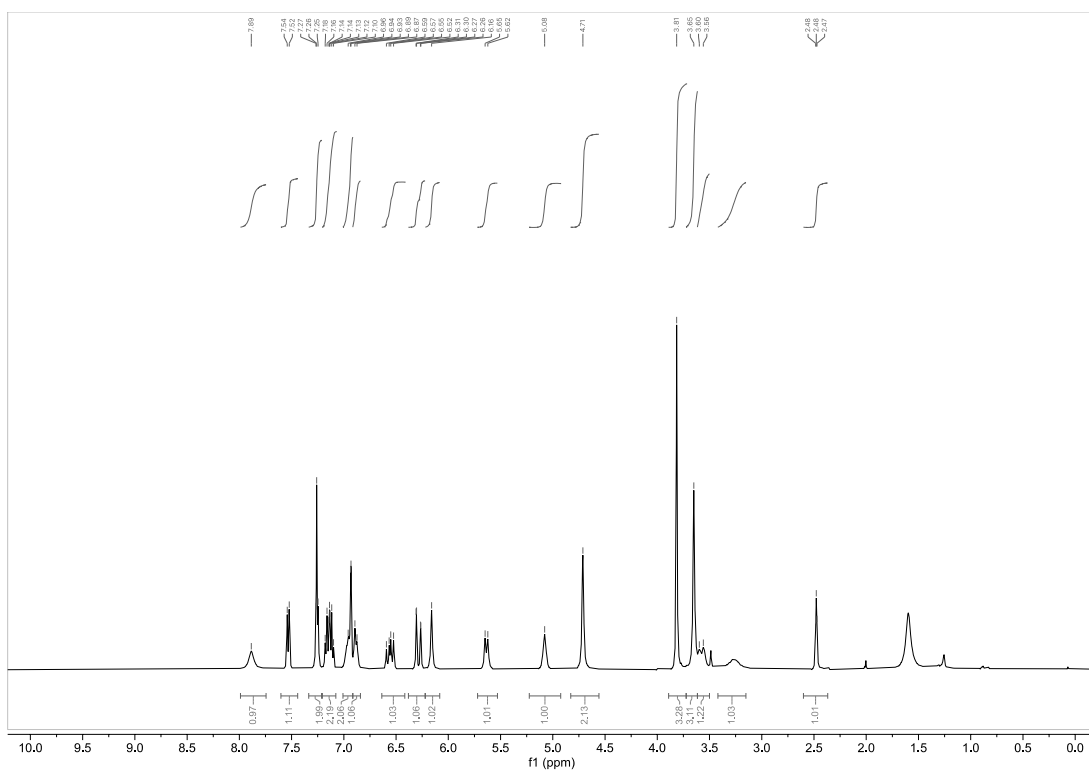

**<sup>1</sup>H NMR spectrum of WX-01-04 (CDCl<sub>3</sub>, 400 MHz)**

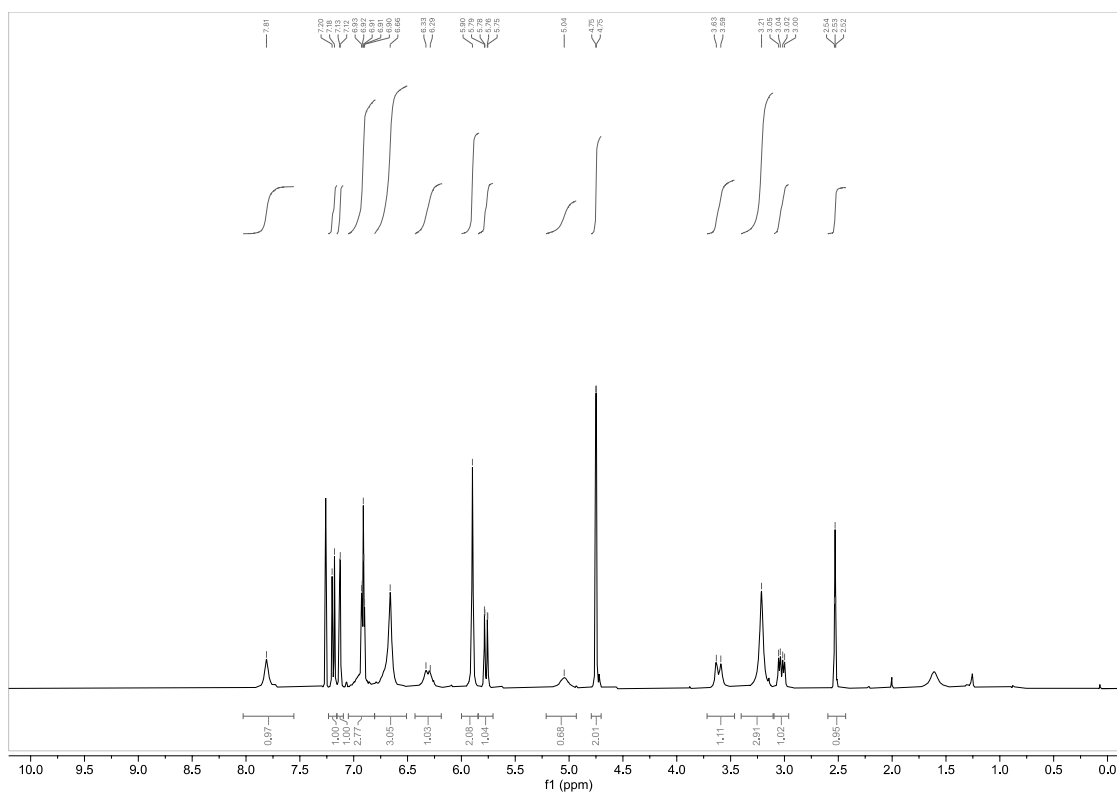

**<sup>1</sup>H NMR spectrum of WX-01-09 (CDCl<sub>3</sub>, 400 MHz)**

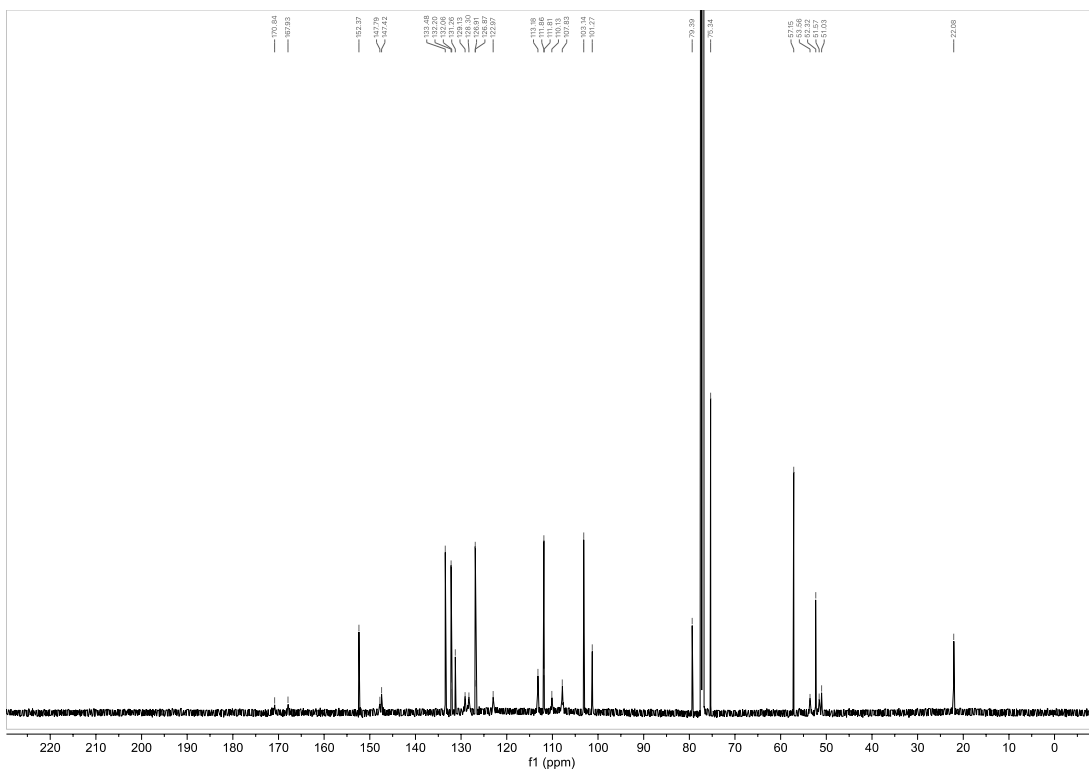

**<sup>13</sup>C NMR spectrum of WX-01-09 (CDCl<sub>3</sub>, 151 MHz)**

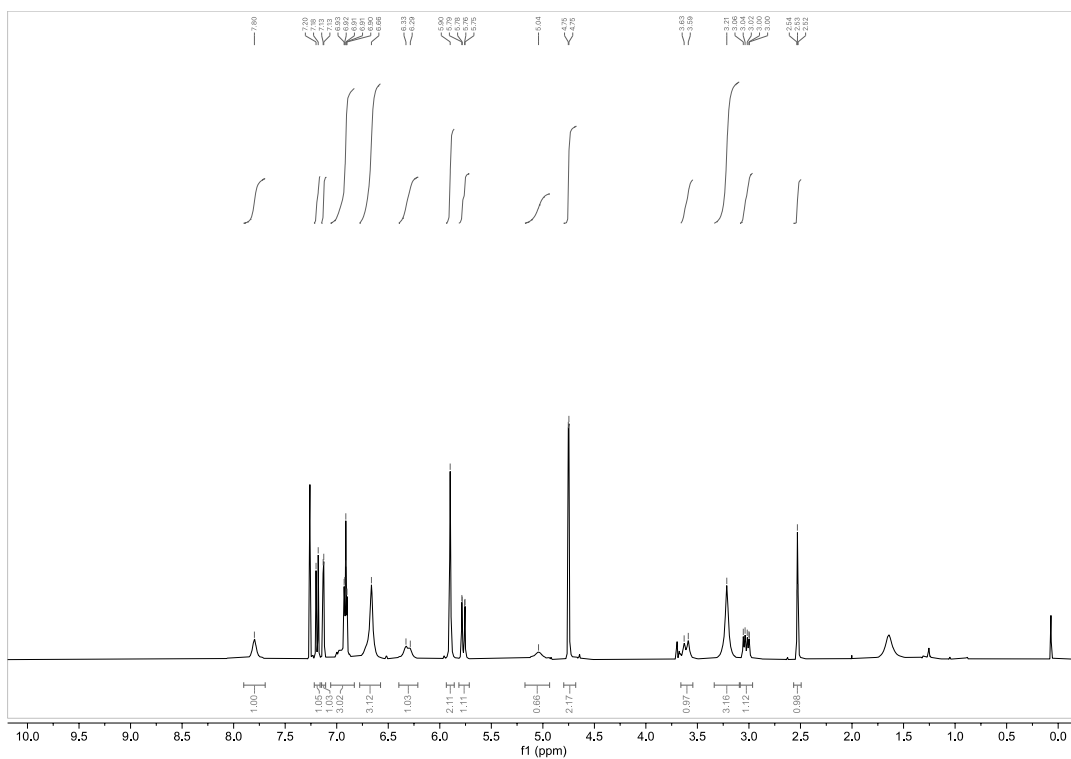

**<sup>1</sup>H NMR spectrum of WX-01-11 (CDCl<sub>3</sub>, 400 MHz)**

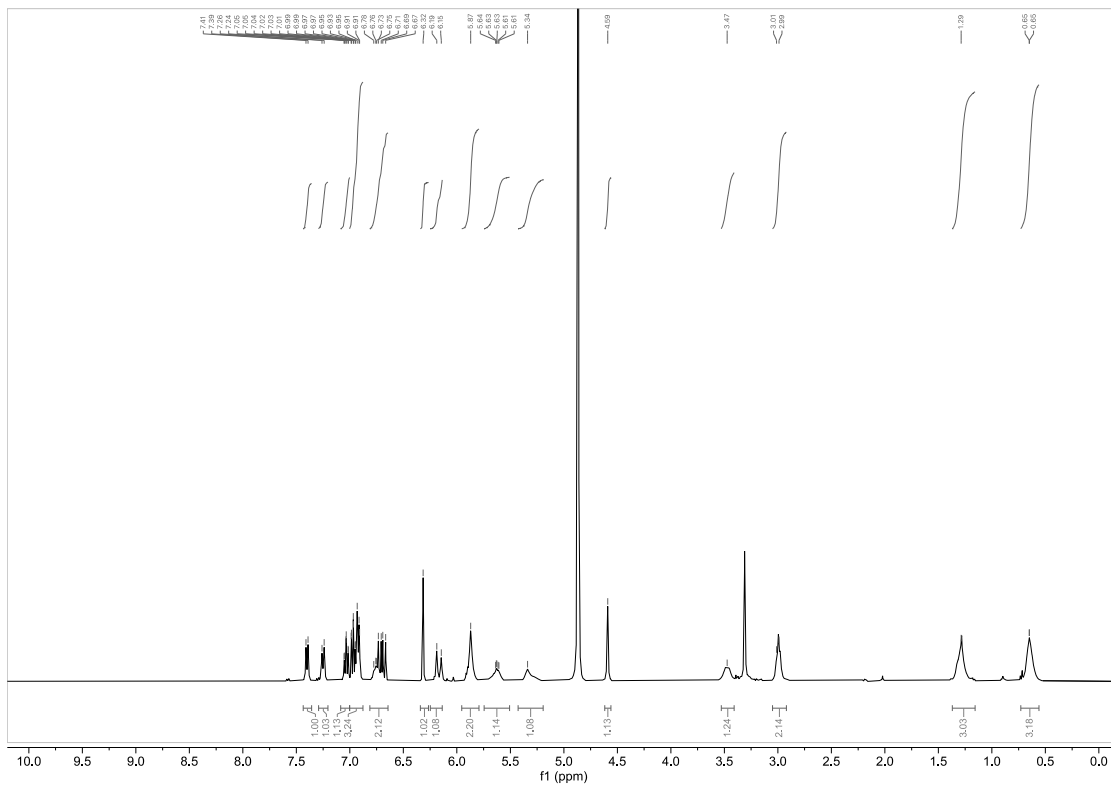

**<sup>1</sup>H NMR spectrum of WX-02-26 (CD<sub>3</sub>OD, 400 MHz)**

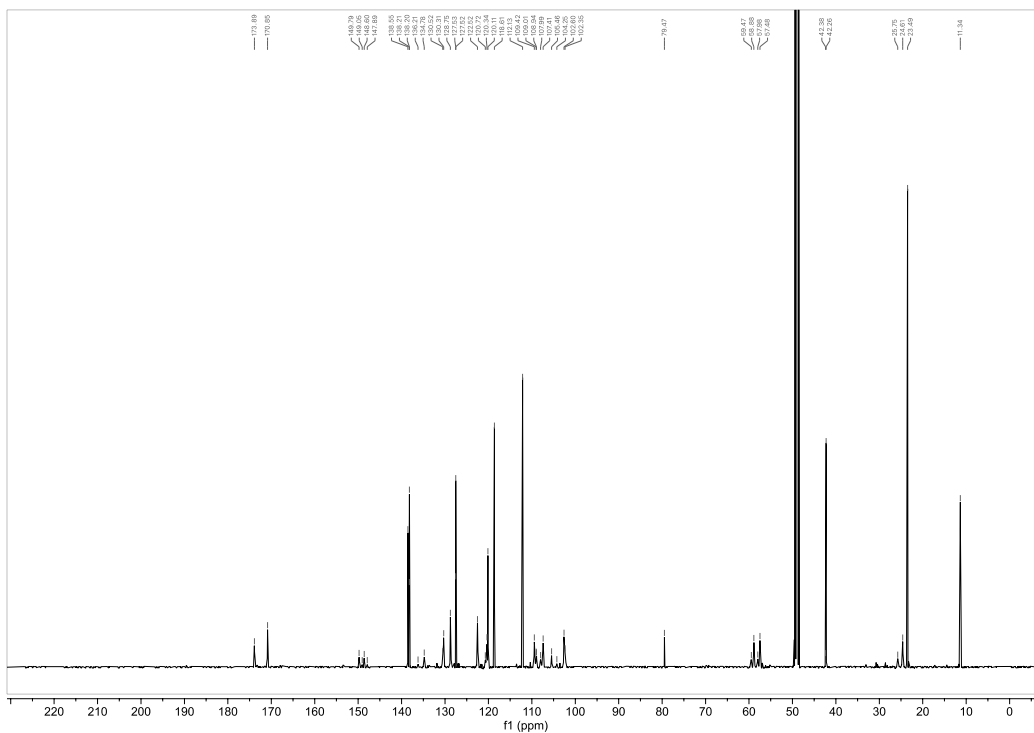

**<sup>13</sup>C NMR spectrum of WX-02-26 (CD<sub>3</sub>OD, 151 MHz)**



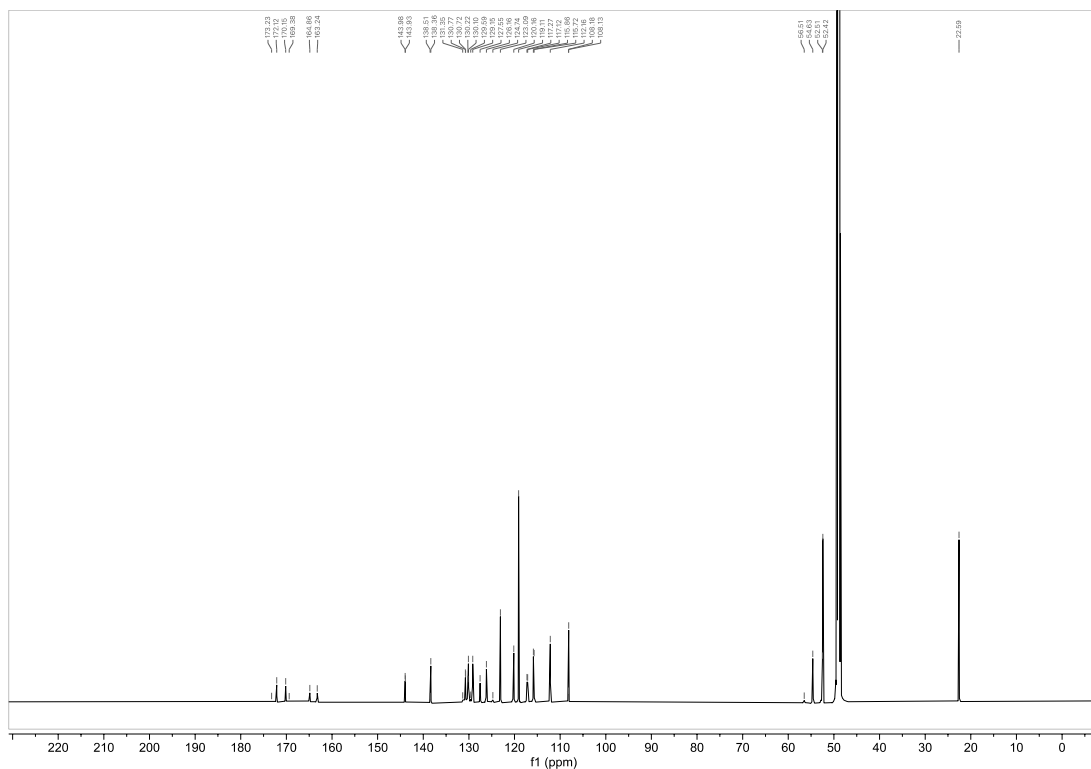

**$^{13}\text{C}$  NMR spectrum of WX-03-57 ( $\text{CD}_3\text{OD}$ , 151 MHz)**

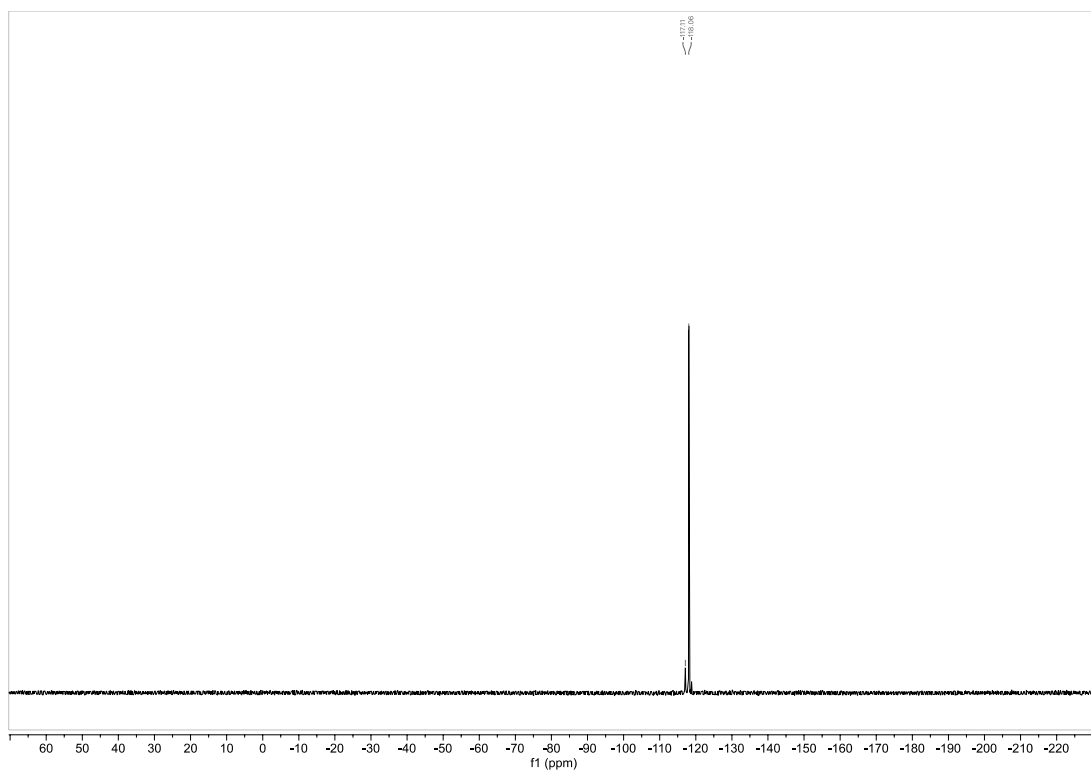

**$^{19}\text{F}$  NMR spectrum of WX-03-57 ( $\text{CD}_3\text{OD}$ , 376 MHz)**

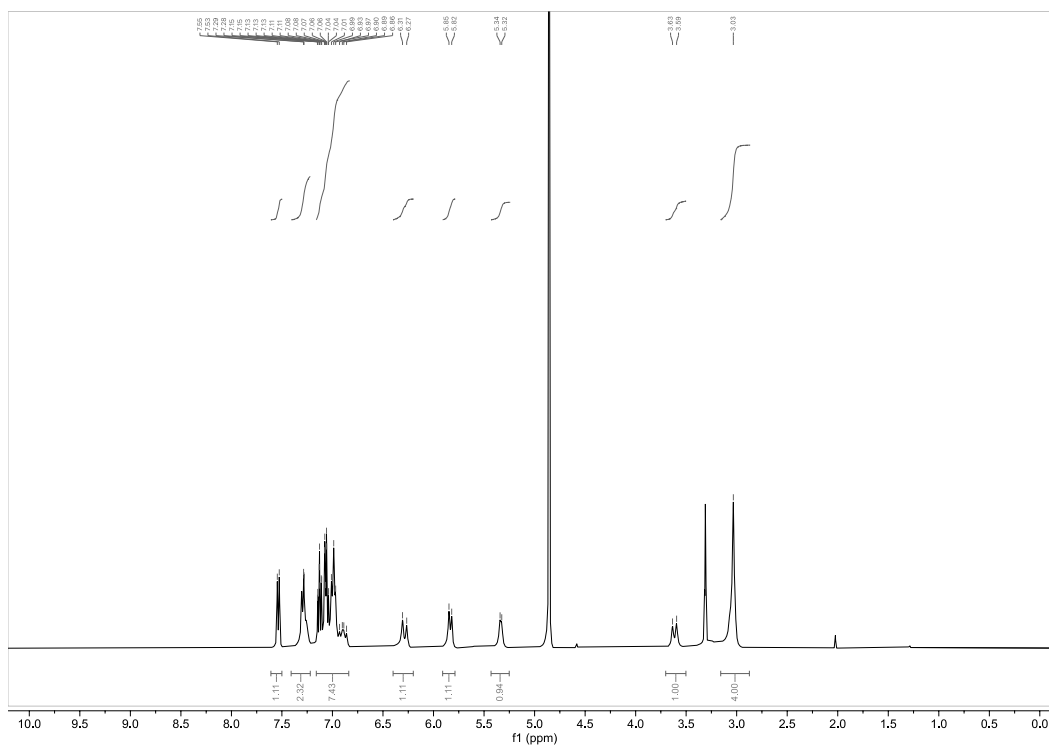

**<sup>1</sup>H NMR spectrum of WX-03-59 (CD<sub>3</sub>OD, 400 MHz)**

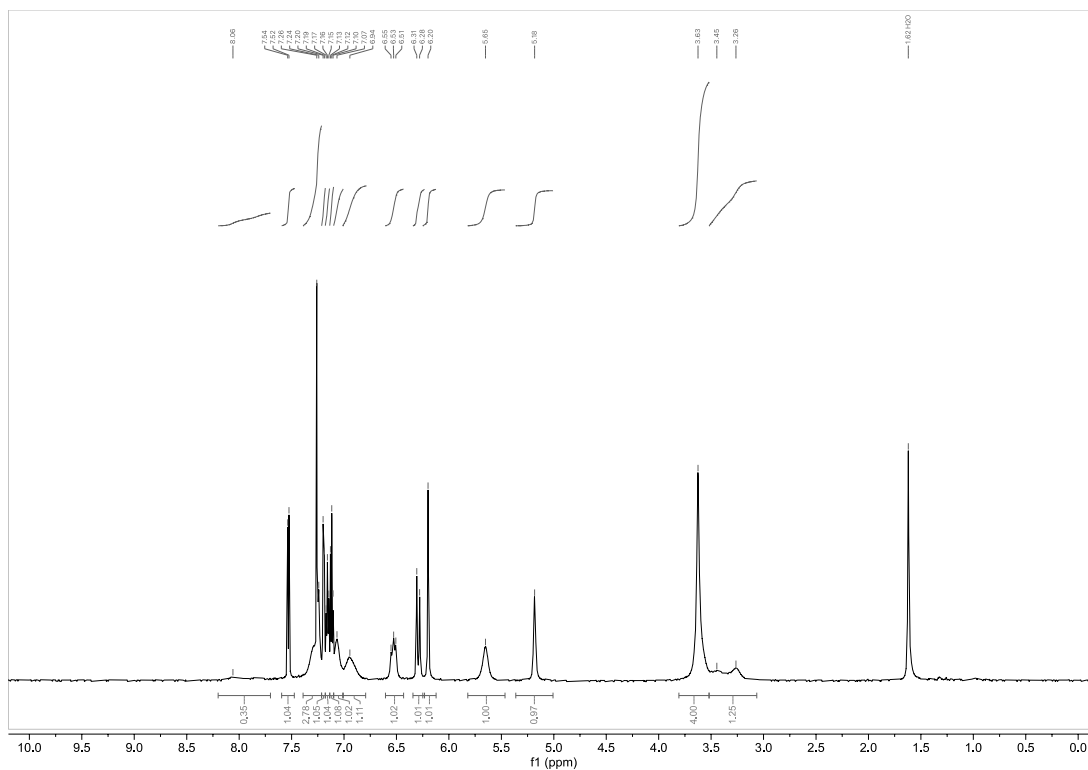

**<sup>1</sup>H NMR spectrum of WX-03-58 (CDCl<sub>3</sub>, 600 MHz)**

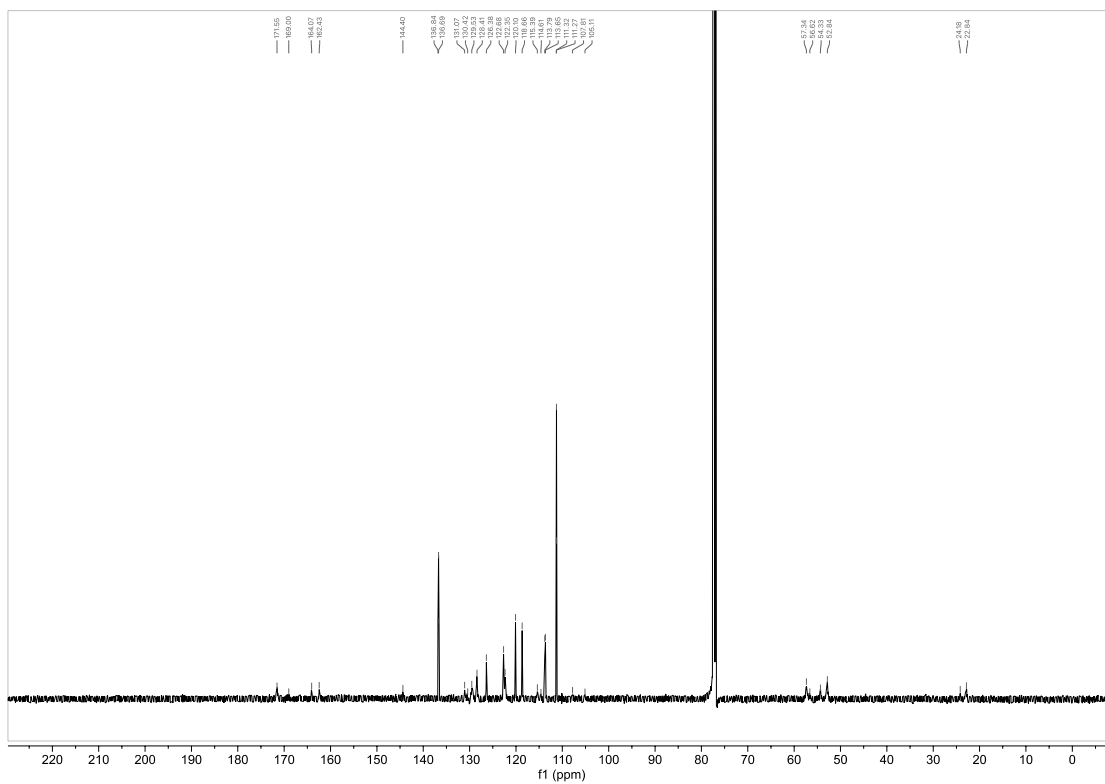

**<sup>13</sup>C NMR spectrum of WX-03-58 (CDCl<sub>3</sub>, 151 MHz)**

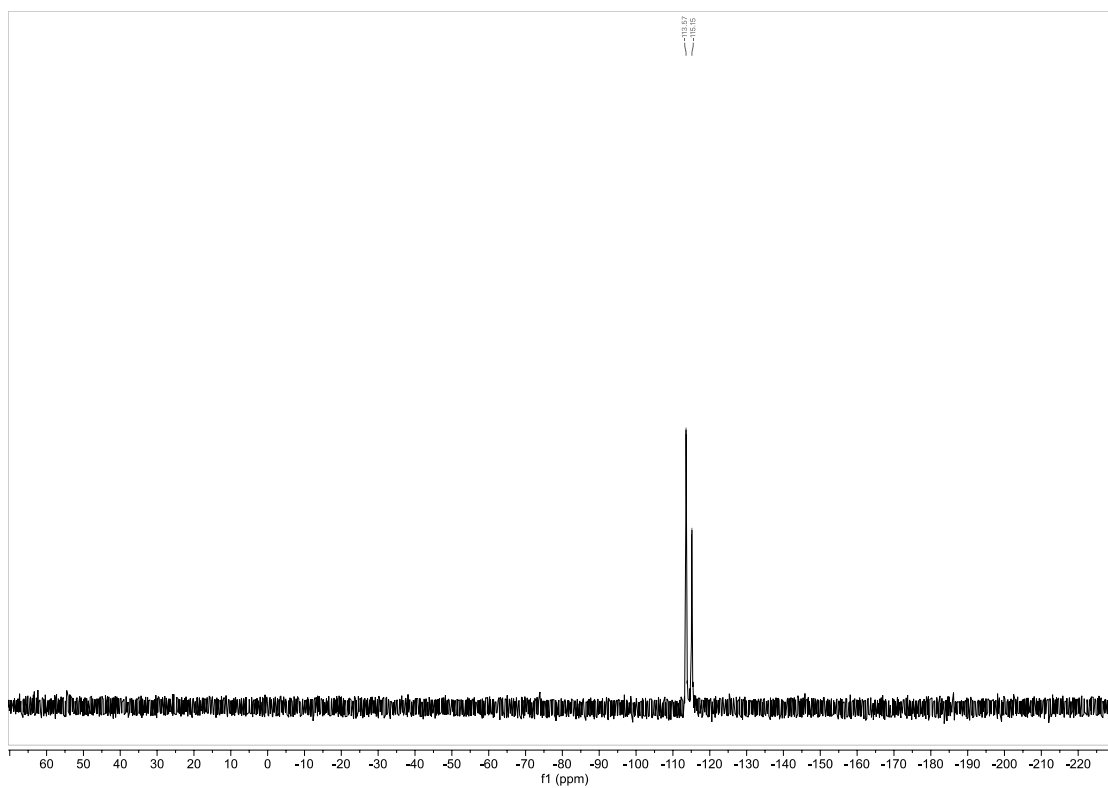

**<sup>19</sup>F NMR spectrum of WX-03-58 (CDCl<sub>3</sub>, 376 MHz)**





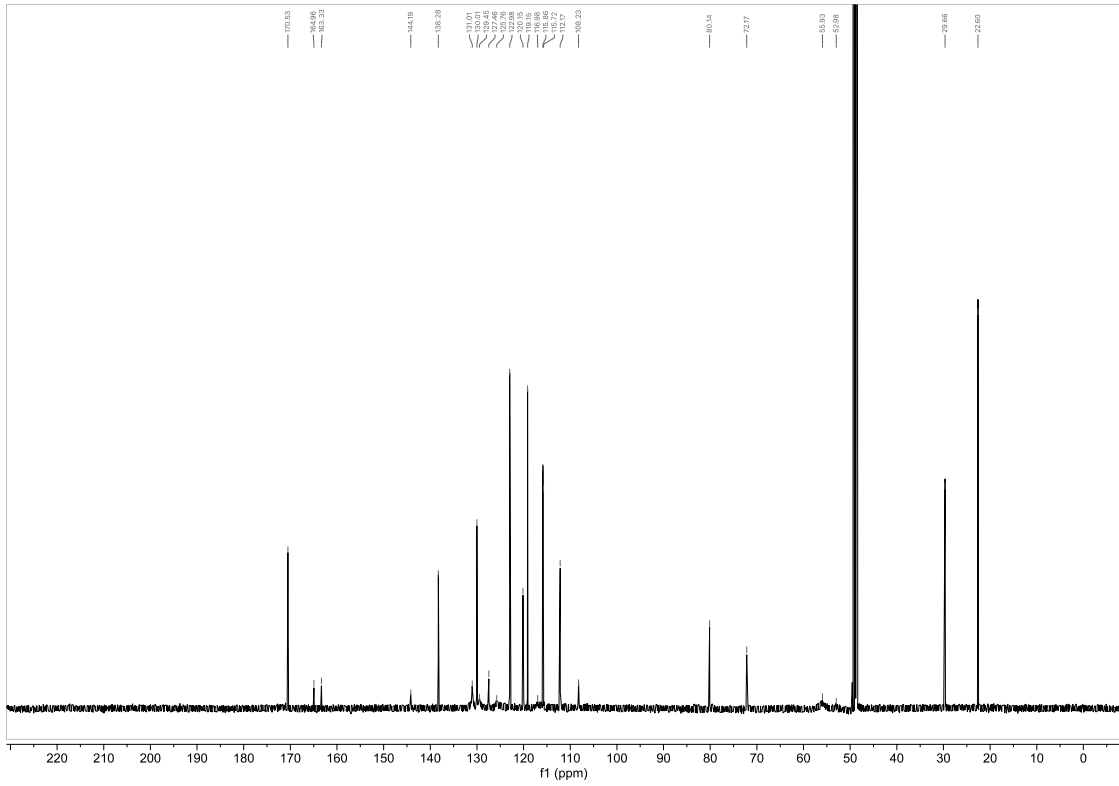

**<sup>13</sup>C NMR spectrum of WX-03-338 (CD<sub>3</sub>OD, 151 MHz)**

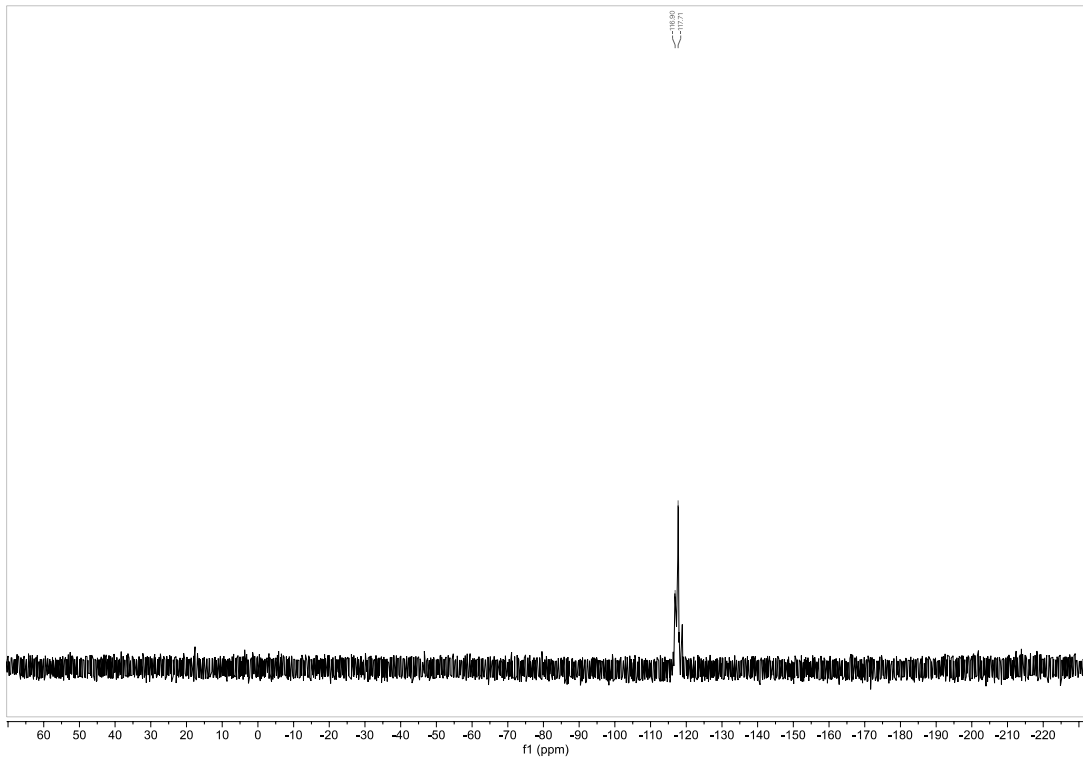

**<sup>19</sup>F NMR spectrum of WX-03-338 (CD<sub>3</sub>OD, 376 MHz)**



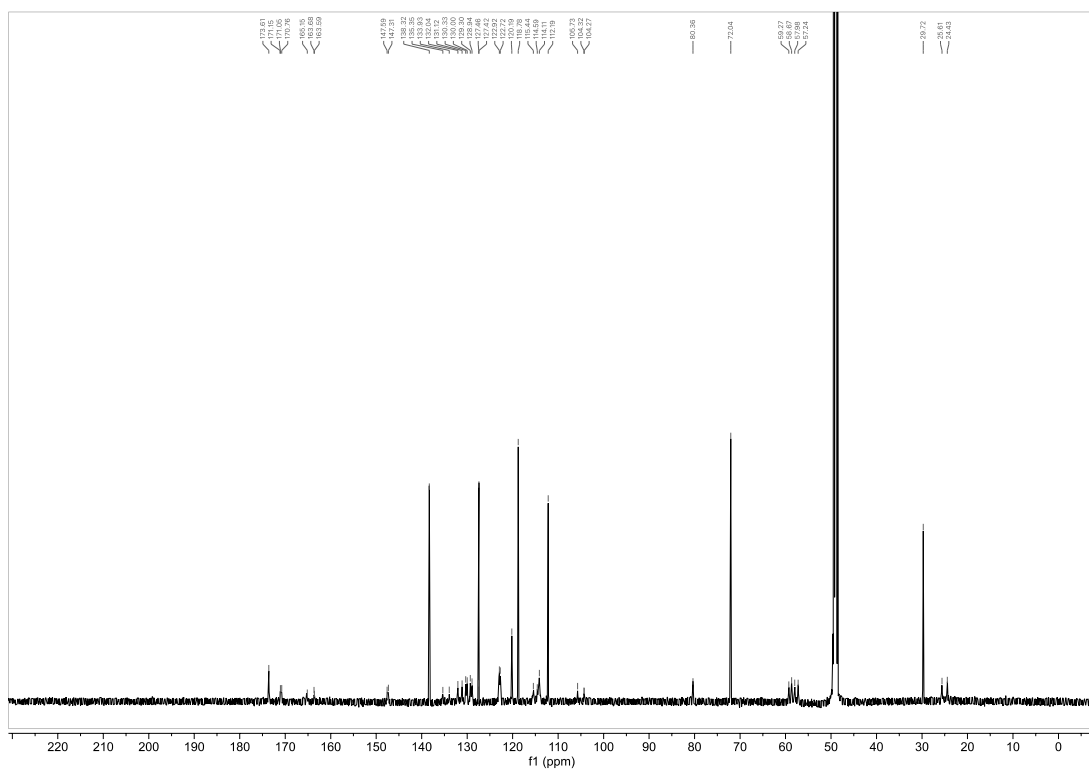

**<sup>13</sup>C NMR spectrum of WX-03-339 (CD<sub>3</sub>OD, 151 MHz)**

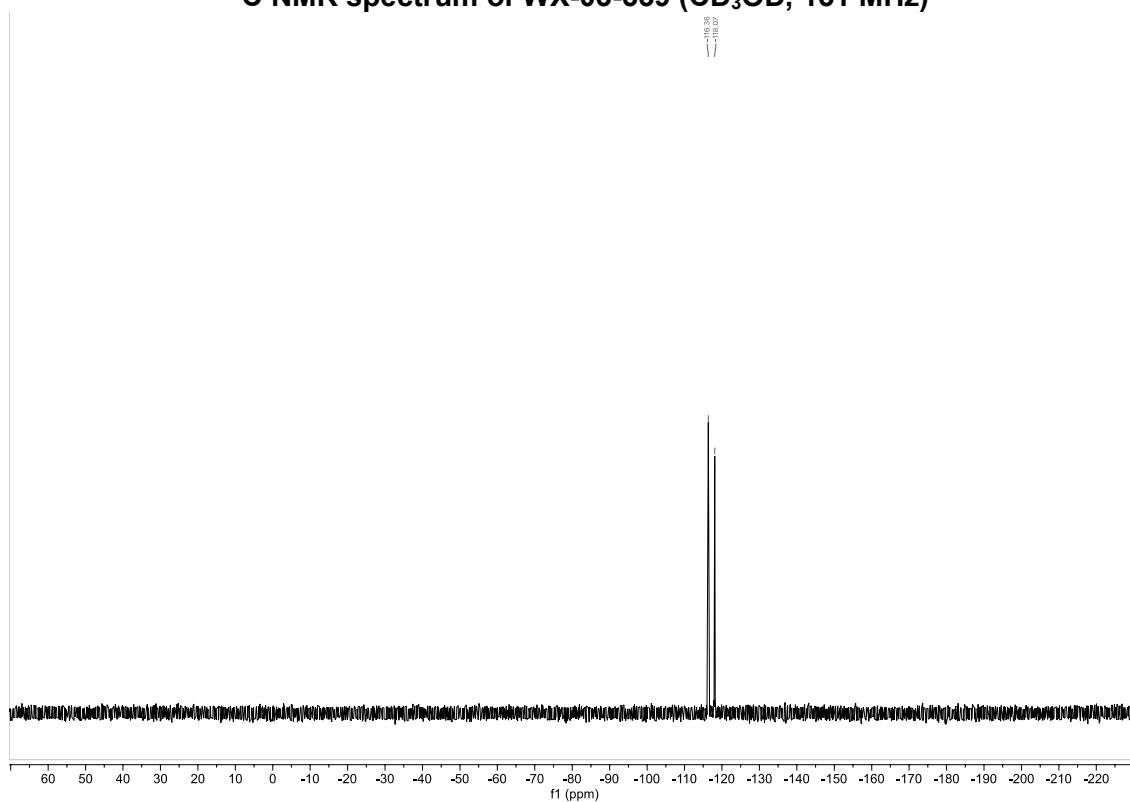

**<sup>19</sup>F NMR spectrum of WX-03-339 (CD<sub>3</sub>OD, 376 MHz)**





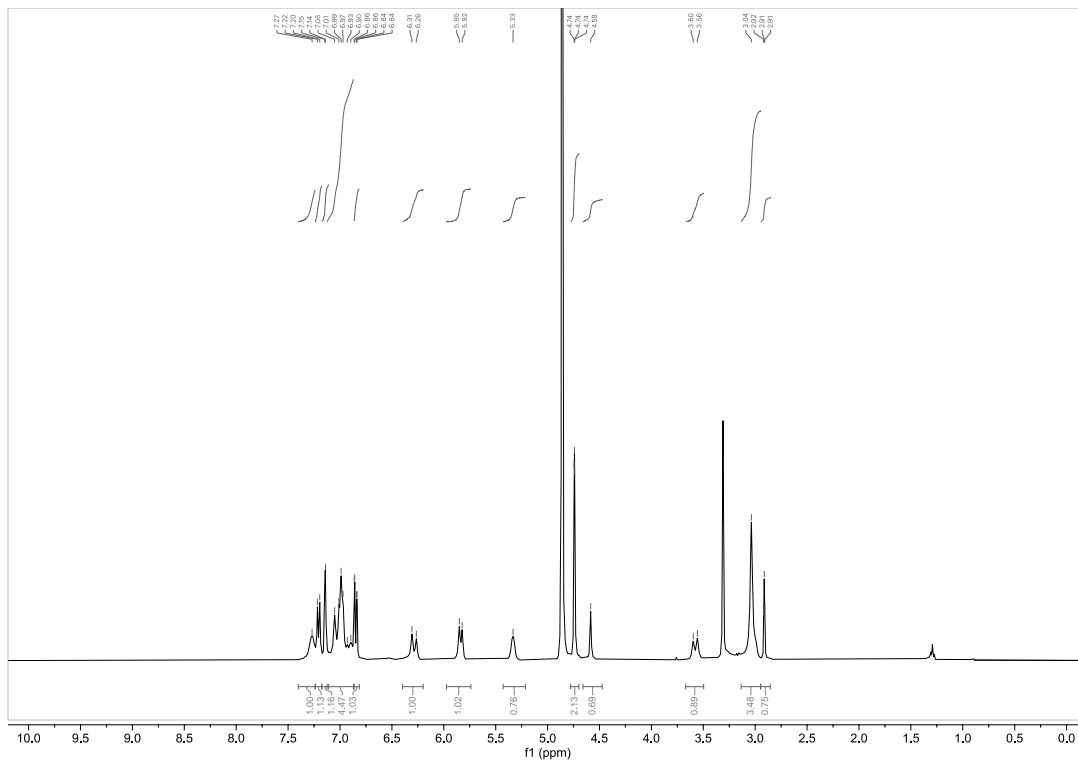

**<sup>1</sup>H NMR spectrum of WX-03-348 (CD<sub>3</sub>OD, 400 MHz)**

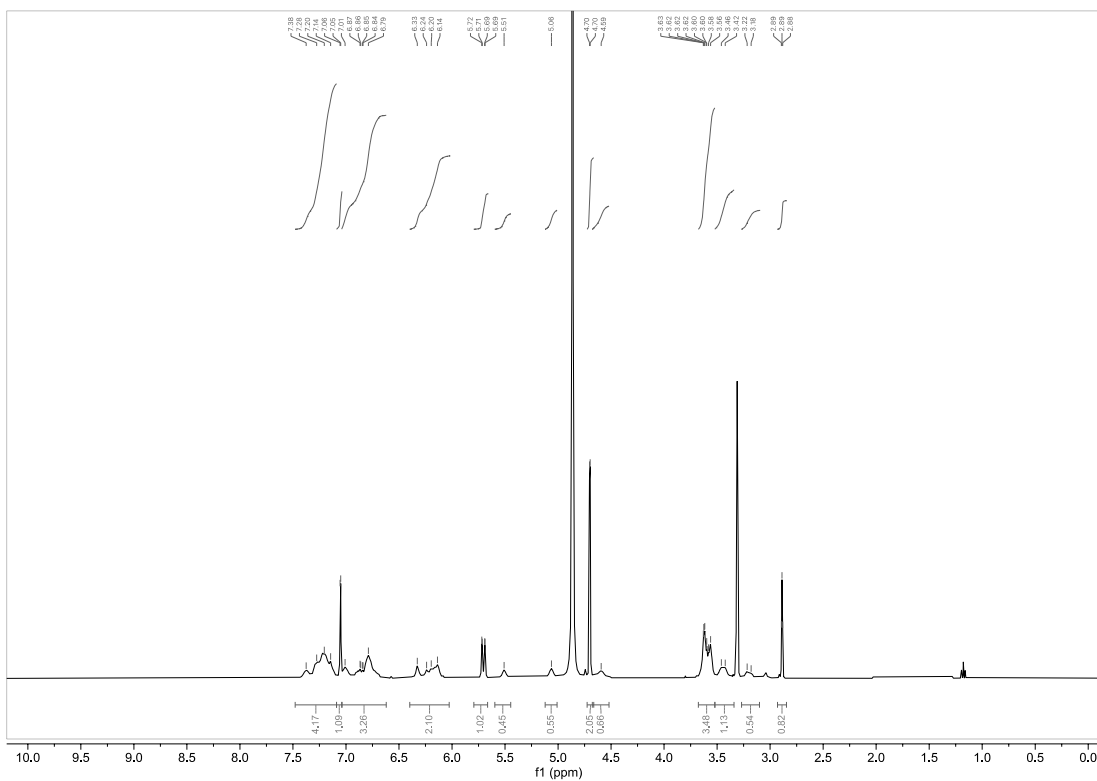

**<sup>1</sup>H NMR spectrum of WX-03-347 (CD<sub>3</sub>OD, 400 MHz)**

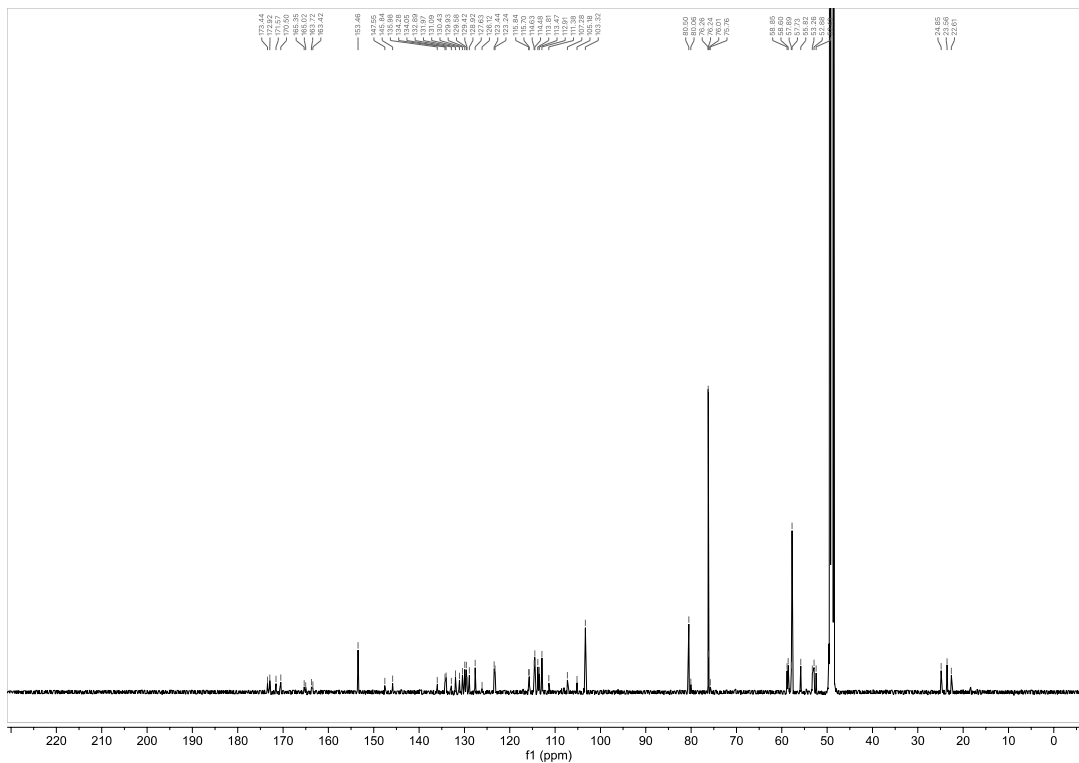

**<sup>13</sup>C NMR spectrum of WX-03-347 (CD<sub>3</sub>OD, 151 MHz)**

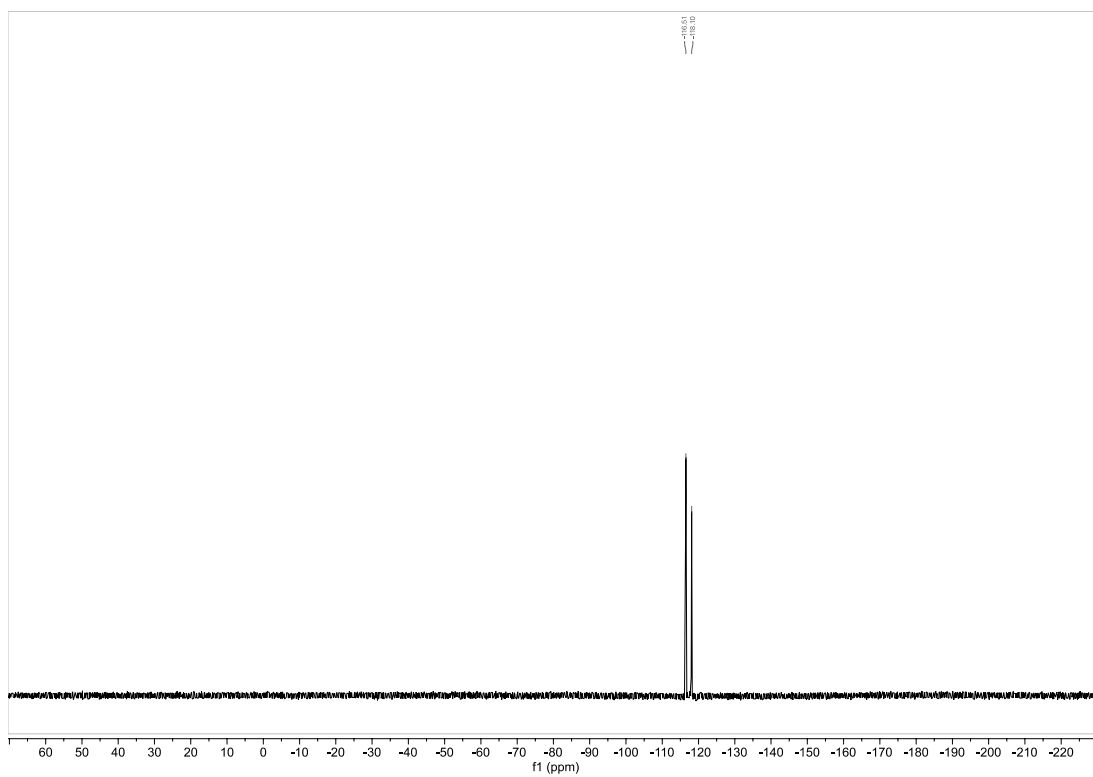

**<sup>19</sup>F NMR spectrum of WX-03-347 (CD<sub>3</sub>OD, 376 MHz)**



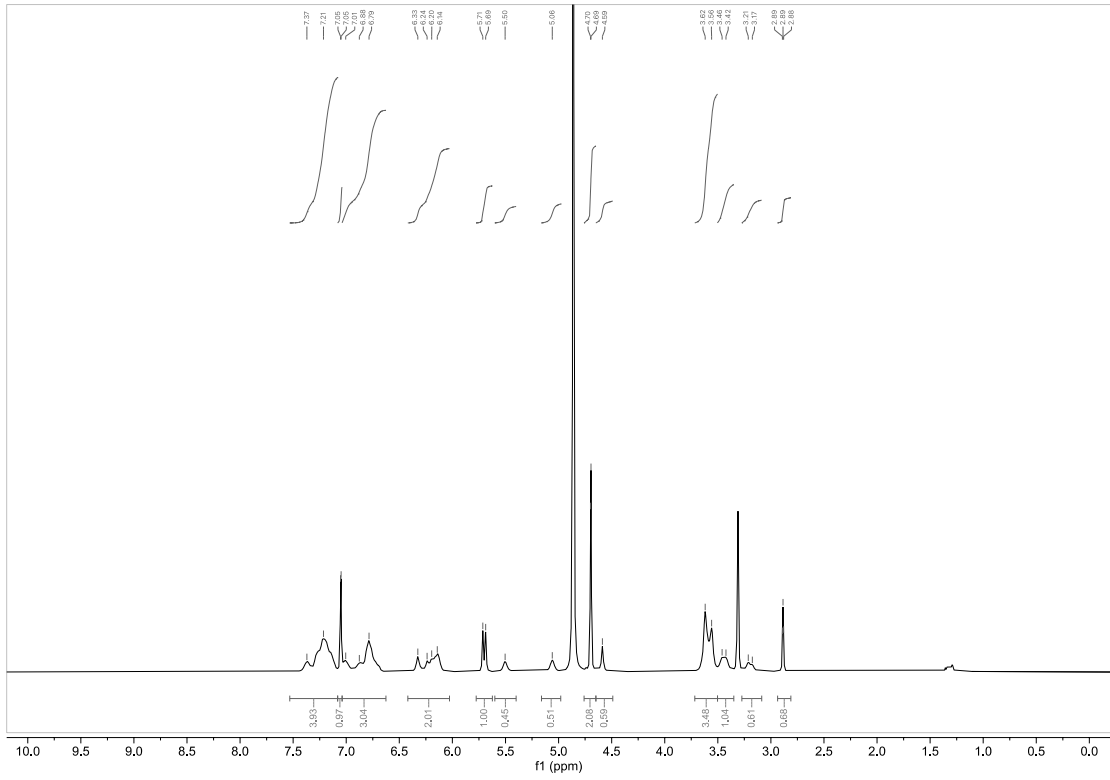

**<sup>1</sup>H NMR spectrum of WX-03-349 (CD<sub>3</sub>OD, 400 MHz)**
