# Supplementary material
Source: PubMed Central journal article supplement (PMC11684312)
Supplement: NIHMS2033297-supplement-Supp_Table_1.pdf [file NIHMS2033297-supplement-Supp_Table_1.pdf]

**Supplementary Table 1: Summary of the rate and percentage of glutathione consumption by representative stereoprobes at 2 h and 6 h time points.**

| <b>Stereoprobe</b> | <b>% GSH consumed</b> | <b>M<sup>-1</sup>s<sup>-1</sup></b> | <b>Time (h)</b> | <b>Average M-1s-1 for both timepoints</b> |
|--------------------|-----------------------|-------------------------------------|-----------------|-------------------------------------------|
| WX-02-16           | 63                    | 0.09                                | 6               | 0.09                                      |
|                    | 28                    | 0.09                                | 2               |                                           |
| WX-02-26           | 73                    | 0.12                                | 6               | 0.13                                      |
|                    | 37                    | 0.13                                | 2               |                                           |
| WX-02-36           | 59                    | 0.08                                | 6               | 0.08                                      |
|                    | 26                    | 0.08                                | 2               |                                           |
| WX-02-46           | 65                    | 0.10                                | 6               | 0.10                                      |
|                    | 29                    | 0.10                                | 2               |                                           |
| WX-03-57           | 41                    | 0.05                                | 6               | 0.05                                      |
|                    | 14                    | 0.04                                | 2               |                                           |
| WX-03-58           | 87                    | 0.19                                | 6               | 0.20                                      |
|                    | 51                    | 0.20                                | 2               |                                           |
| WX-03-59           | 47                    | 0.06                                | 6               | 0.06                                      |
|                    | 17                    | 0.05                                | 2               |                                           |
| WX-03-60           | 74                    | 0.12                                | 6               | 0.13                                      |
|                    | 38                    | 0.13                                | 2               |                                           |
