# Supplementary material
Source: PubMed Central journal article supplement (PMC11684312)
Supplement: NIHMS2033297-supplement-Supp_Table_2.pdf [file NIHMS2033297-supplement-Supp_Table_2.pdf]

**Supplementary Table 2: List of reagents not mentioned in the method section, and their sources and catalog numbers.**

| <b>Reagents</b>                                              | <b>Source</b>            | <b>Catalog number</b> |
|--------------------------------------------------------------|--------------------------|-----------------------|
| Desthiobiotin<br>polyethyleneoxide<br>iodoacetamide (IA-DTB) | Santa Cruz Biotechnology | sc-300424             |
| EZ-Link™ NHS-Desthiobiotin                                   | ThermoFisher Scientific  | 16129                 |
| Urea                                                         | Fisher Scientific        | M1084871000           |
| Iodoacetamide                                                | Sigma-Aldrich            | I1149-25G             |
| Dithiothreitol (DTT)                                         | Fisher Bioreagents       | BP172-25              |
| Sequencing Grade Modified<br>Trypsin                         | Promega                  | V5111                 |
| Streptavidin Agarose Resin                                   | Fisher Scientific        | 20349                 |
| Micro Bio-Spin column                                        | Bio-Rad                  | 7326204               |
| Nonidet™ P40 substitute<br>(Igepal™ CA-630)                  | USB Corporation          | 19628                 |
| Triethylammonium<br>bicarbonate buffer                       | Sigma-Aldrich            | T7408-500ML           |
| TMT10plex™ Isobaric Label<br>Reagent Set                     | ThermoFisher Scientific  | 90406                 |
| TMTpro™ 16plex Label<br>Reagent Set                          | ThermoFisher Scientific  | A44520                |
| Ammonium bicarbonate                                         | Sigma-Aldrich            | 09830-500G            |
| Hydroxylamine solution                                       | Sigma-Aldrich            | 467804-10ML           |
| Formic acid, ~98%, for mass<br>spectrometry                  | Honeywell Fluka          | 94318-250ML-F         |
| methanol                                                     | Fisher Scientific        | A452SK-4              |
| Acetonitrile LC-MS Grade                                     | Fisher Scientific        | A955                  |
| Water LC-MS Grade                                            | Fisher Scientific        | W6-4                  |
| Protein LoBind Tubes 1.5 mL                                  | Fisher Scientific        | E925000090            |
| eBioscience™<br>Permeabilization Buffer (10X)                | ThermoFisher Scientific  | 00-8333-56            |
| MAD2L1BP antibody                                            | proteintech              | 15344-1-AP            |
| MAD2L1 antibody                                              | Abcam                    | ab10691-100           |
| MAD1L1 antibody                                              | Abcam                    | ab184560              |
| Propidium iodide                                             | AAT BIOQUEST INC         | 17515                 |
| Monarch® RNase A                                             | New England Biolabs      | 76339-788             |
